# Supplementary material for: Photoredox β-thiol-α-carbonylation of enones accompanied by unexpected Csp2–C(CO) bond cleavage
Source: Royal Society of Chemistry journal article supplement (doi:10.1039/d0ob01349h), 2020-01-01

Thermo Scientific LTQ Orbitrap XL

**Ion source** : ESI

**4a** HRMS (ESI)  $m/z$  calcd for  $C_{14}H_{14}ClO_2S^+$  (M+H)<sup>+</sup> 281.03975, found 281.03989.

99\_180906171612 #29 RT: 0.43 AV: 1 NL: 1.87E6  
T: FTMS + p ESI Full ms [150.00-2000.00]

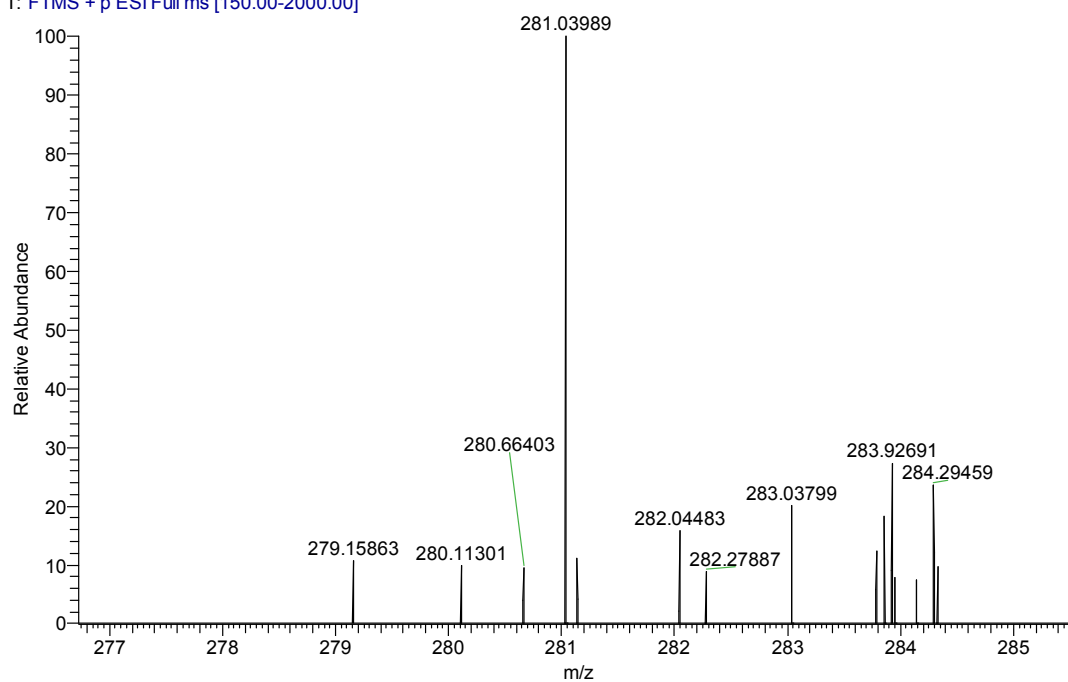

**4c.** HRMS (ESI)  $m/z$  calcd for  $C_{16}H_{17}O_3S$  (M+H)<sup>+</sup> 289.08984, found 289.08957.

98 #26 RT: 0.35 AV: 1 NL: 3.17E6  
T: FTMS + p ESI Full ms [150.00-2000.00]

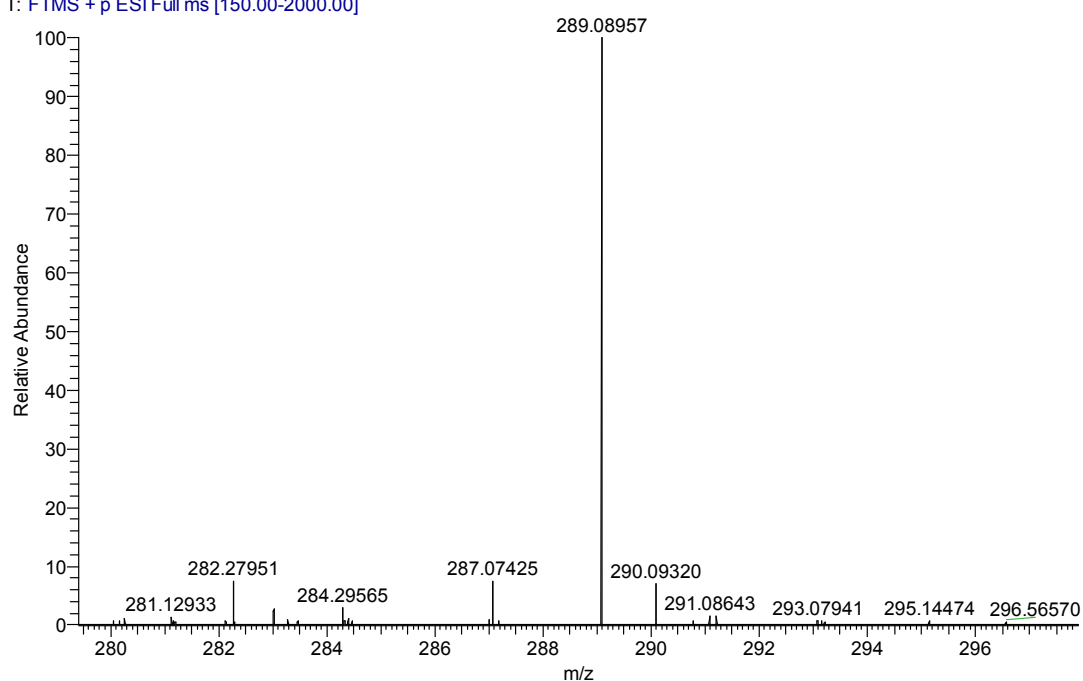

98 #18 RT: 0.24 AV: 1 NL: 1.10E7  
T: FTMS + p ESI Full ms [150.00-2000.00]

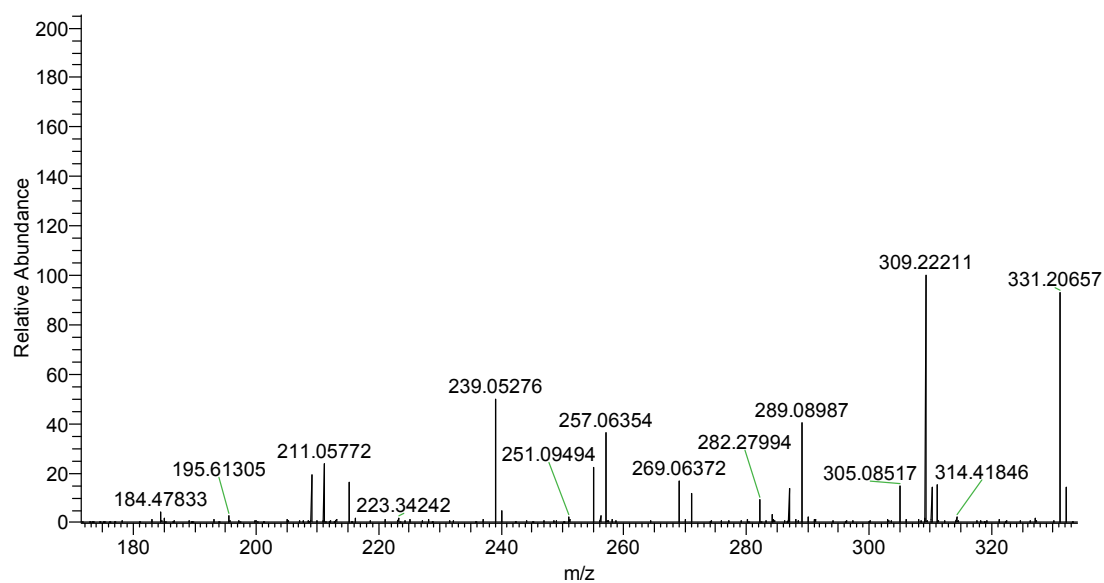

**4e** HRMS (ESI) m/z calcd for  $C_{18}H_{22}ClO_2S^+$  (M+H)<sup>+</sup> 337.10235, found 337.10226.

123 #24 RT: 0.35 AV: 1 NL: 9.19E5  
T: FTMS + p ESI Full ms [150.00-2000.00]

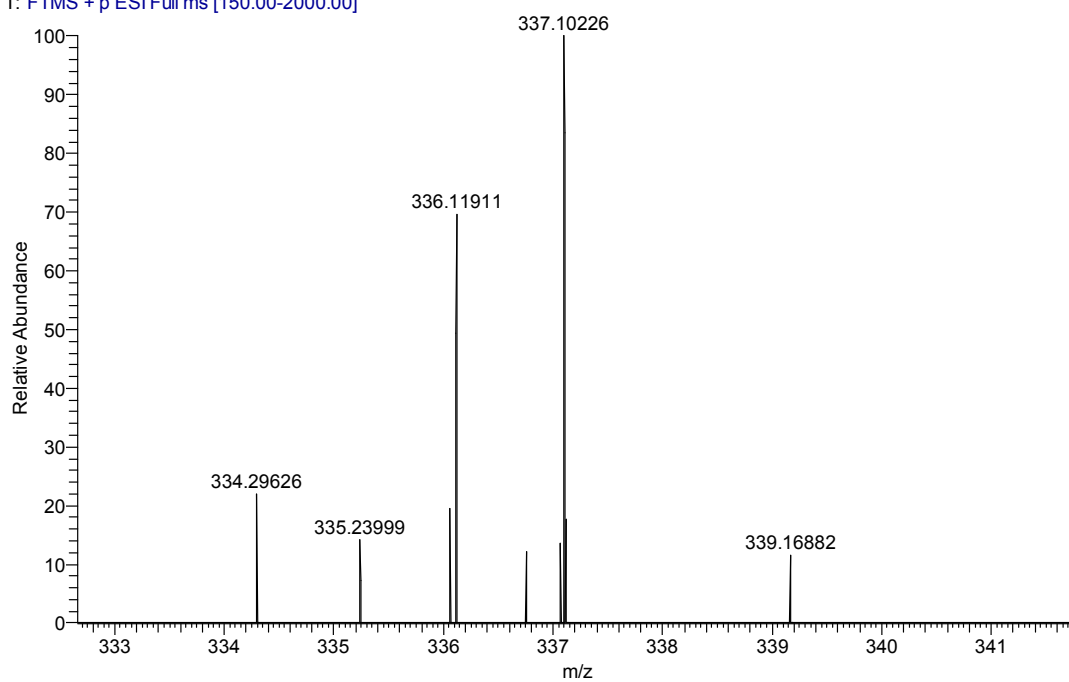

123 #24 RT: 0.35 AV: 1 NL: 1.29E6  
T: FTMS + p ESI Full ms [150.00-2000.00]

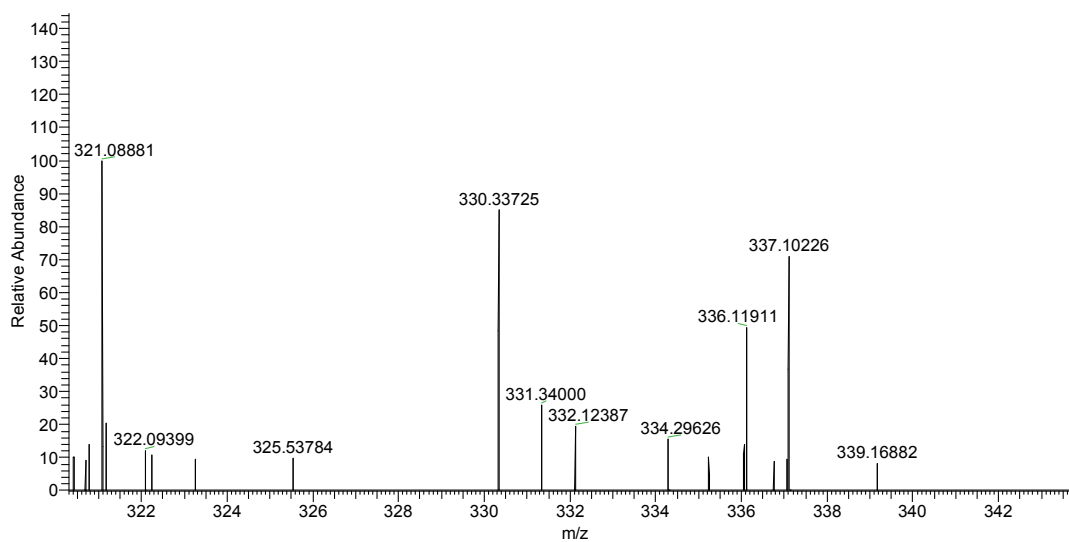

4i HRMS (ESI) m/z calcd for  $C_{14}H_{13}ClFO_2S^+$  (M+H)<sup>+</sup> 299.03033, found 299.03048.

122 #30 RT: 0.44 AV: 1 NL: 1.66E6  
T: FTMS + p ESI Full ms [150.00-2000.00]

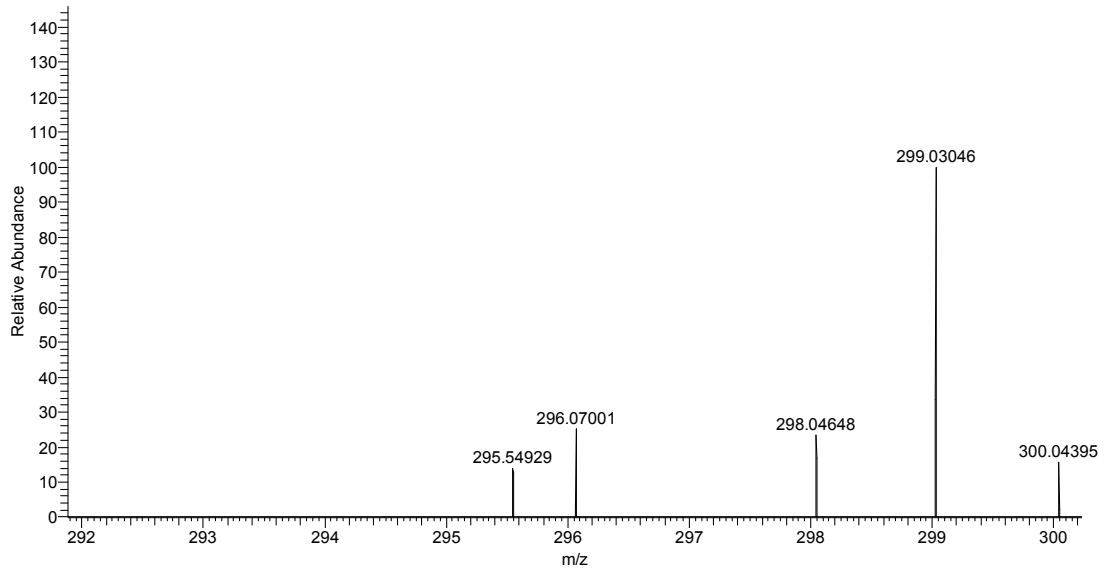

122 #30 RT: 0.44 AV: 1 NL: 4.75E8  
T: FTMS + p ESI Full ms [150.00-2000.00]

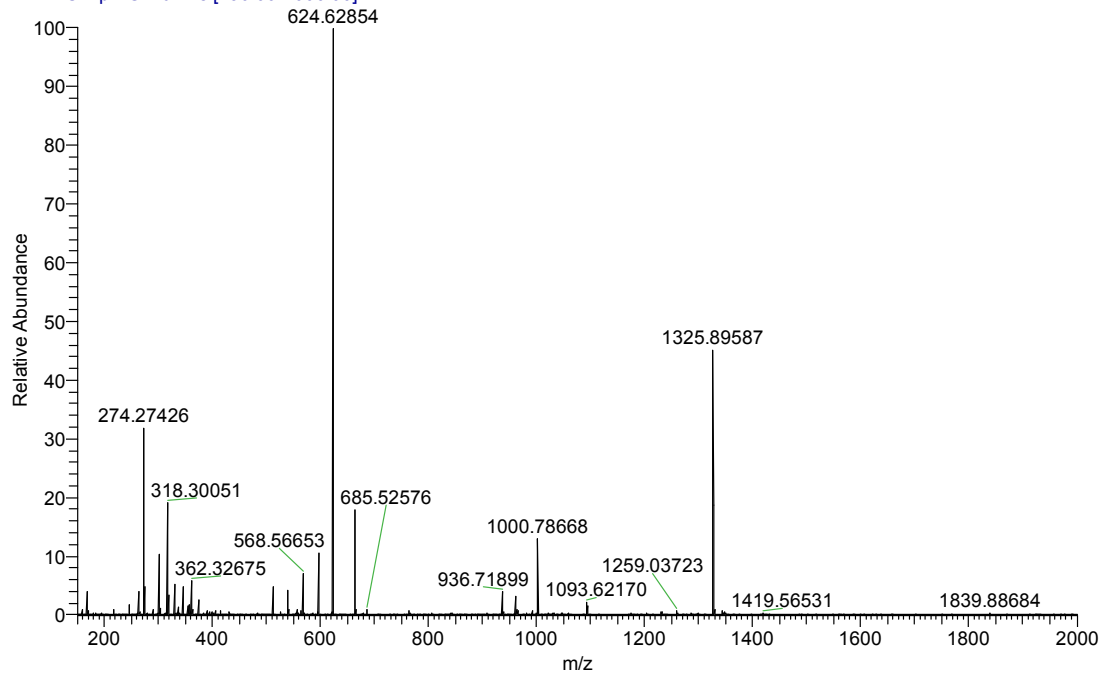

4j HRMS (ESI) m/z calcd for  $C_{15}H_{16}ClO_2S^+$  (M+H)<sup>+</sup> 295.05540, found 295.05576.

124 #12 RT: 0.15 AV: 1 NL: 1.66E6  
T: FTMS + p ESI Full ms [150.00-2000.00]

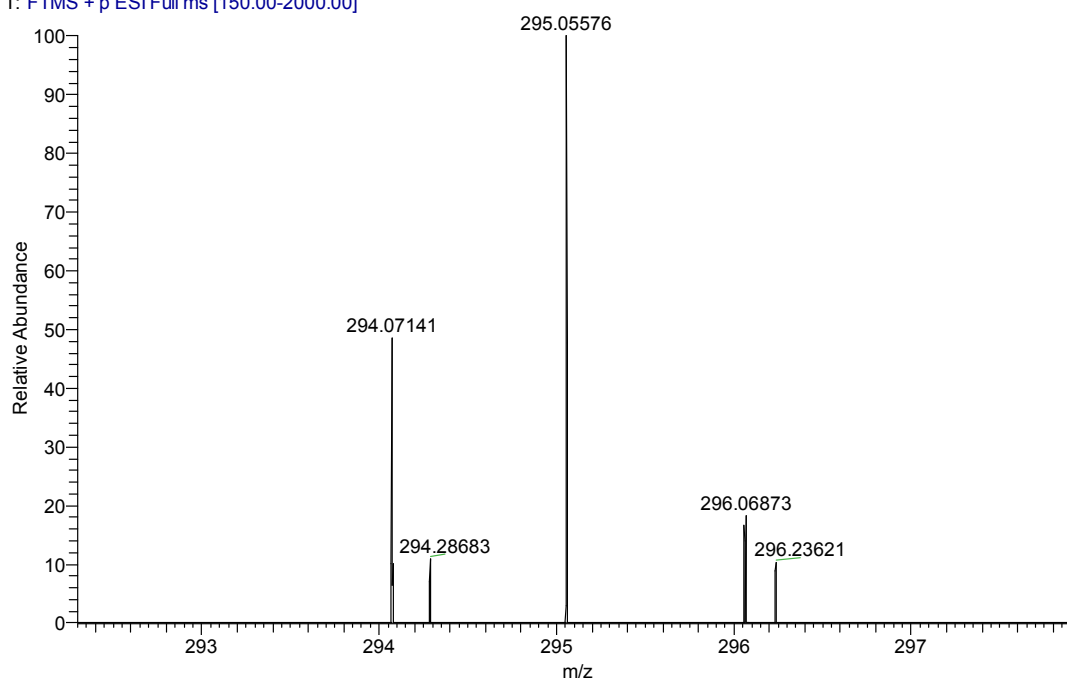

124 #12 RT: 0.15 AV: 1 NL: 9.52E6  
T: FTMS + p ESI Full ms [150.00-2000.00]

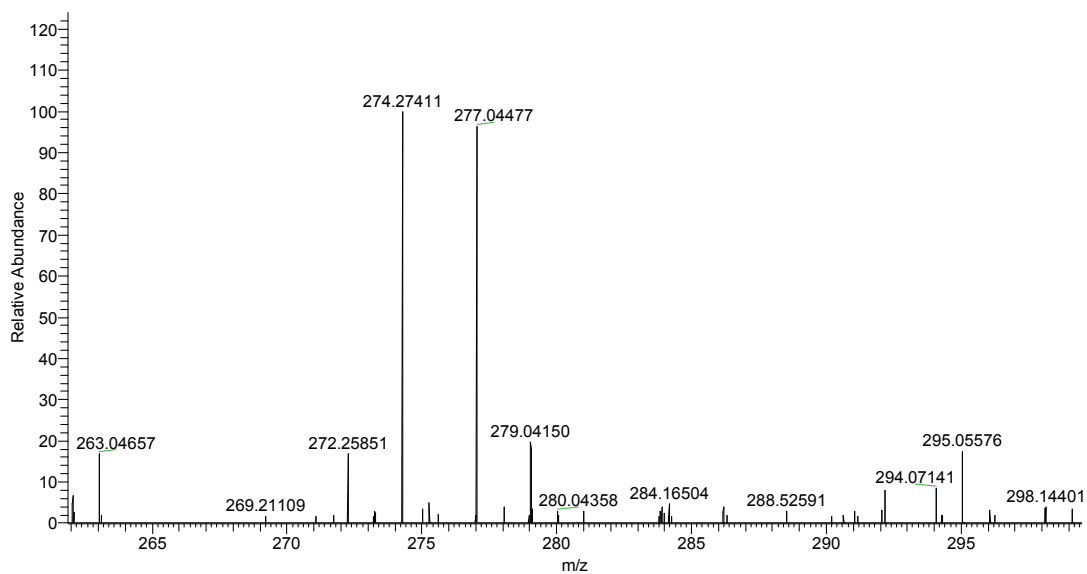

**4k.** HRMS (ESI) m/z calcd for  $C_{18}H_{22}ClO_2^+$  (M+H)<sup>+</sup> 337.10235, found 337.10205.

100\_180906171755 #33 RT: 0.50 AV: 1 NL: 1.12E7  
T: FTMS + p ESI Full ms [150.00-2000.00]

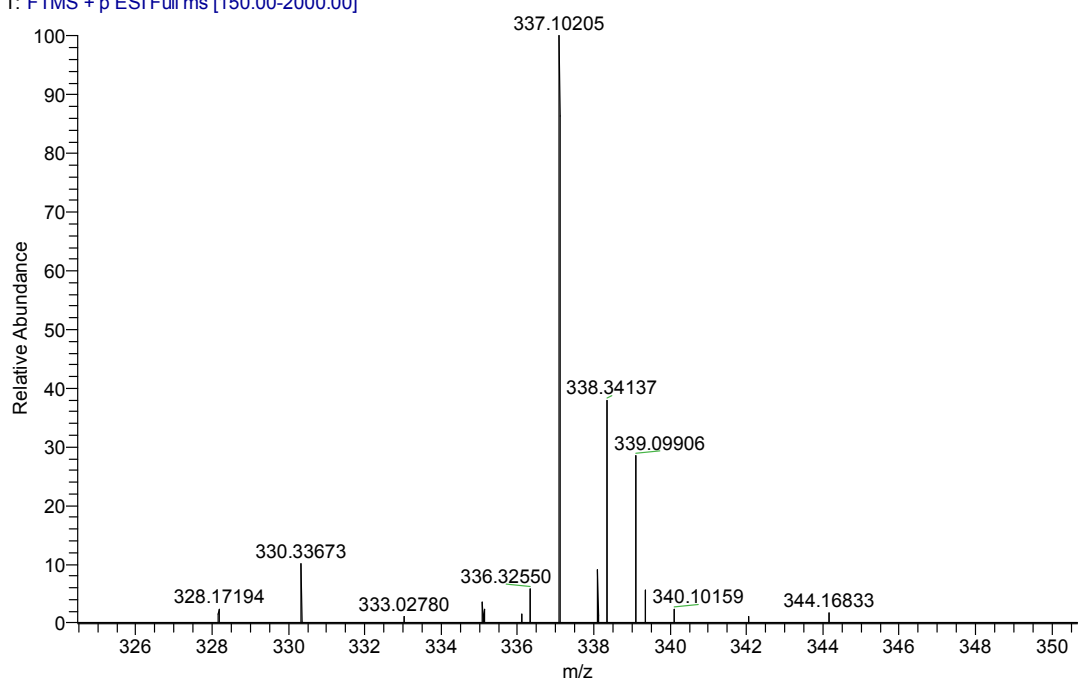

100 #8 RT: 0.09 AV: 1 NL: 8.83E7  
T: FTMS + p ESI Full ms [150.00-2000.00]

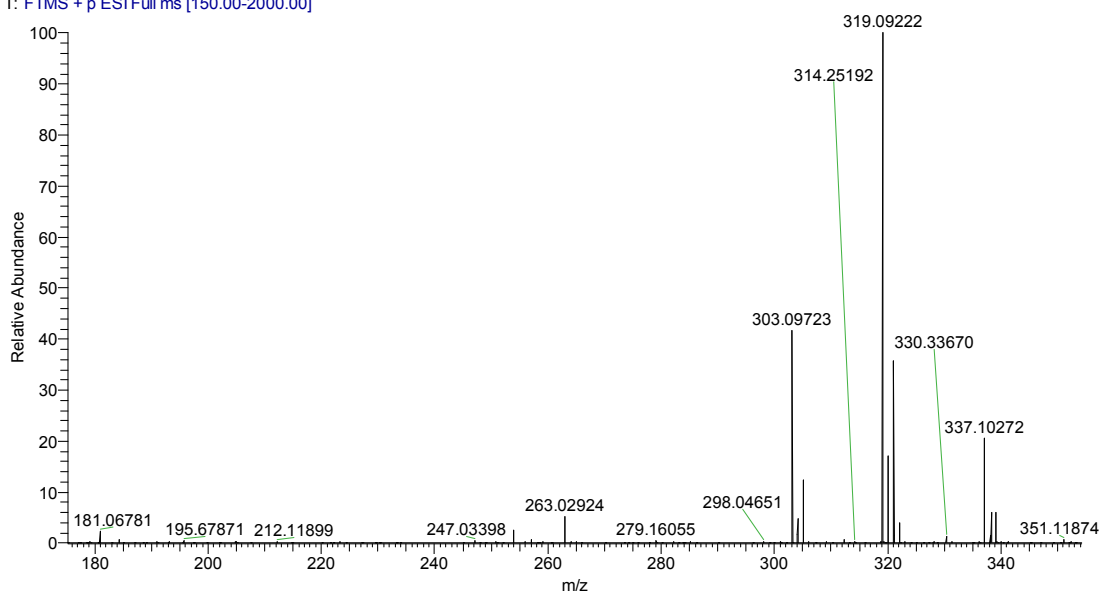

4I. HRMS (ESI) m/z calcd for  $C_{14}H_{13}Cl_2O_2S^+$  (M+H)<sup>+</sup> 315.00078, found 315.00125.

101\_180906171913 #35 RT: 0.52 AV: 1 NL: 1.89E6  
T: FTMS + p ESI Full ms [150.00-2000.00]

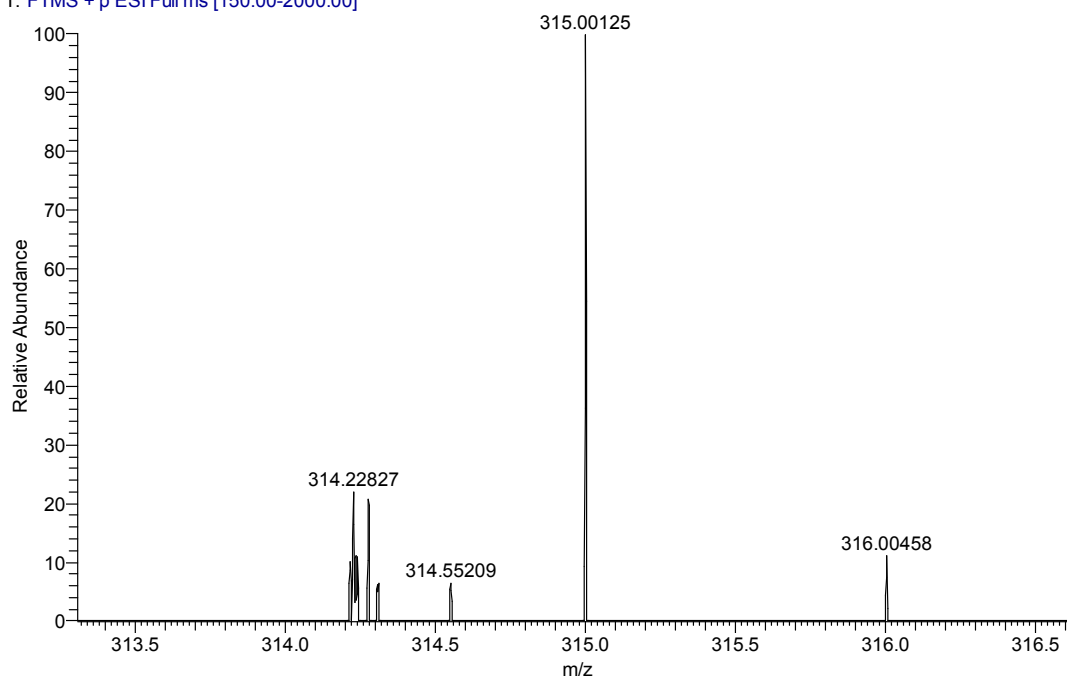

101 #7 RT: 0.08 AV: 1 NL: 1.52E7  
T: FTMS + p ESI Full ms [150.00-2000.00]

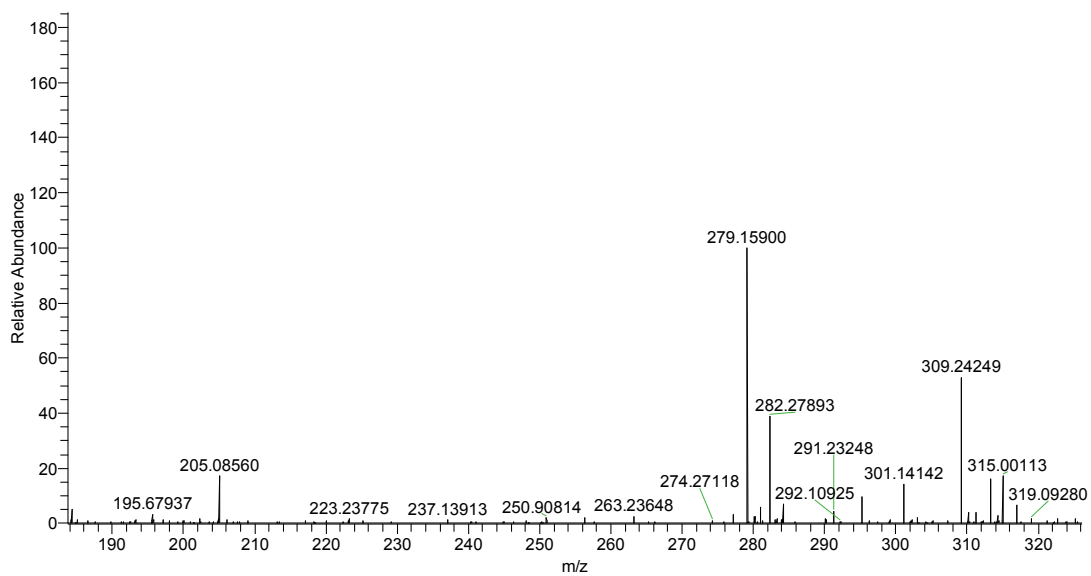

**4m** HRMS (ESI) m/z calcd for  $C_{15}H_{16}ClO_2S^+$  (M+H)<sup>+</sup> 295.05540, found 295.05576.

124 #12 RT: 0.15 AV: 1 NL: 1.66E6  
T: FTMS + p ESI Full ms [150.00-2000.00]

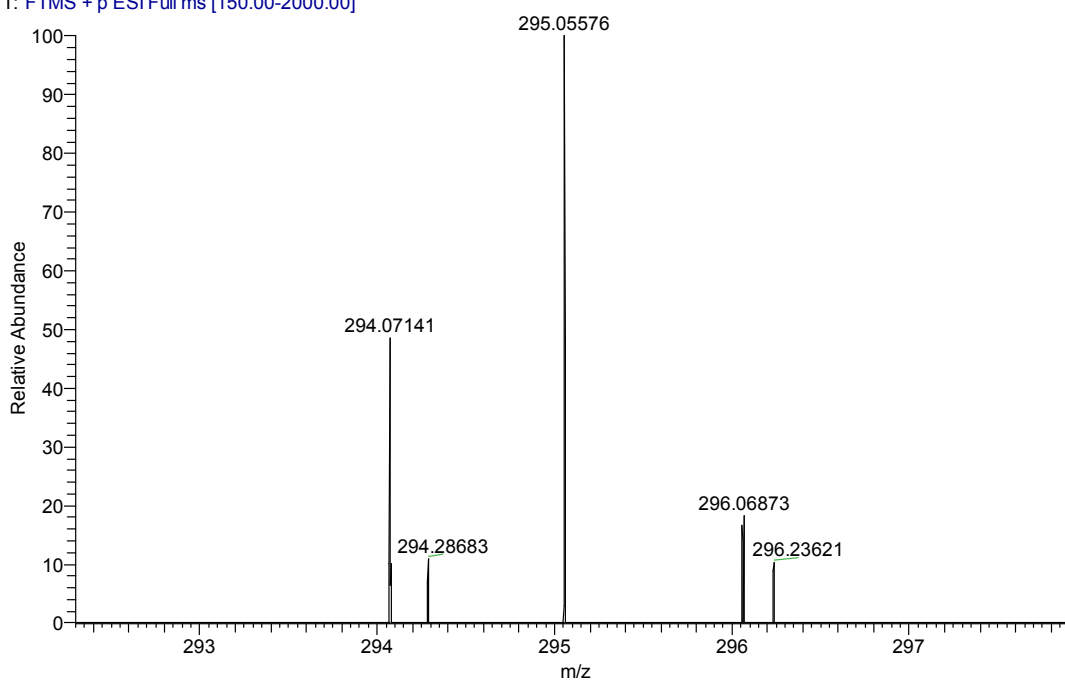

124 #13 RT: 0.17 AV: 1 NL: 1.61E7  
T: FTMS + p ESI Full ms [150.00-2000.00]

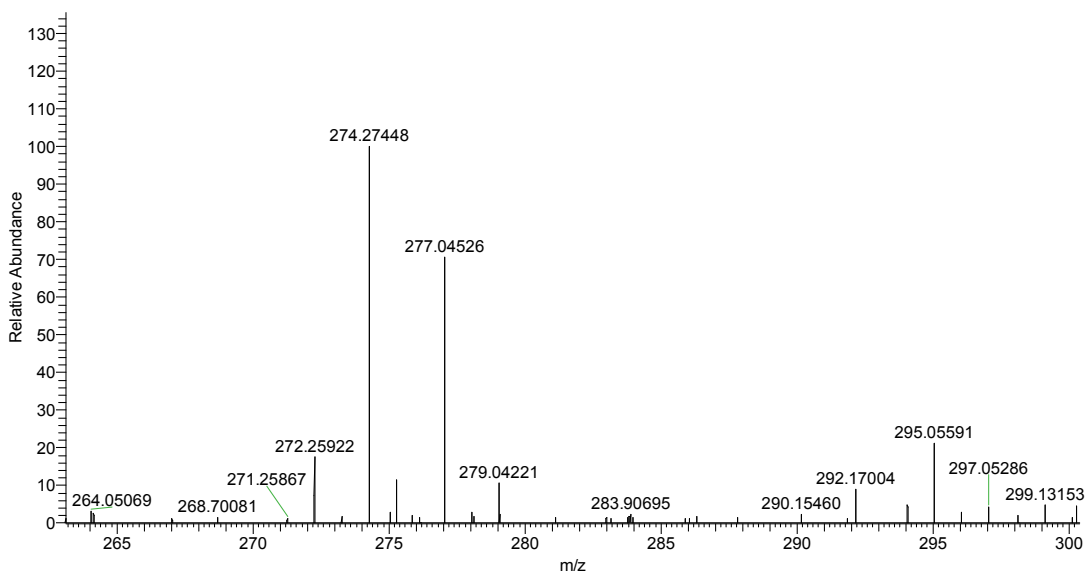

**4n.** HRMS (ESI) m/z calcd for  $C_{14}H_{13}Cl_2O_2S^+$  (M+H)<sup>+</sup> 315.00078, found 315.00055.



103\_180906172141 #2 RT: 0.01 AV: 1 NL: 7.88E5  
T: FTMS + p ESI Full ms [150.00-2000.00]

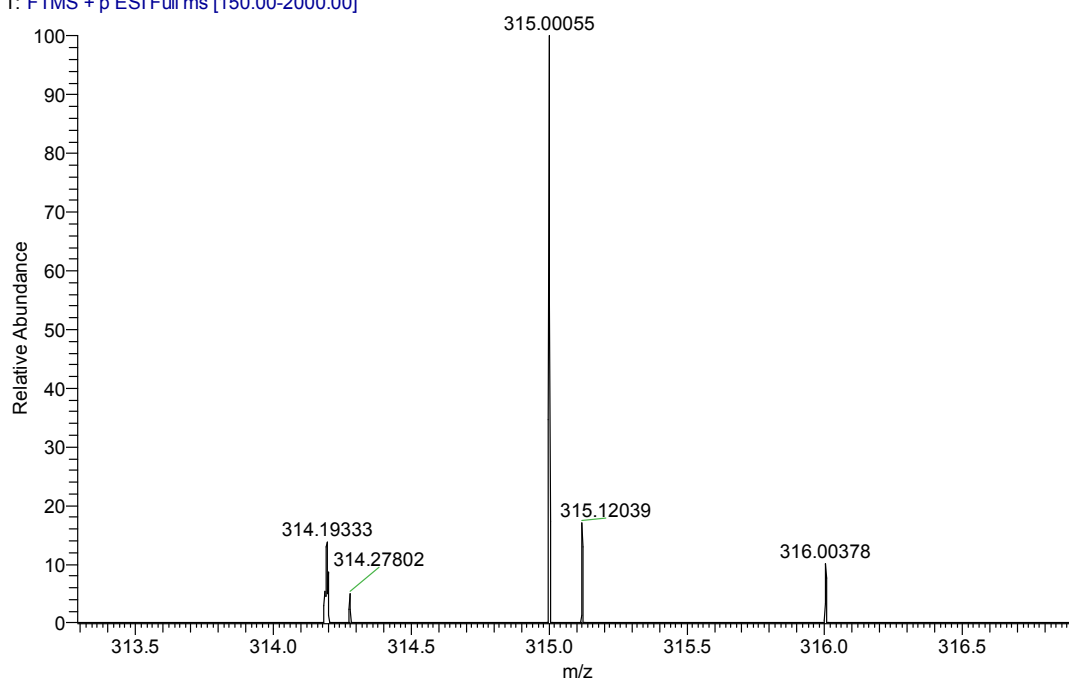

103 #2 RT: 0.01 AV: 1 NL: 1.81E5  
T: FTMS + p ESI Full ms [150.00-2000.00]

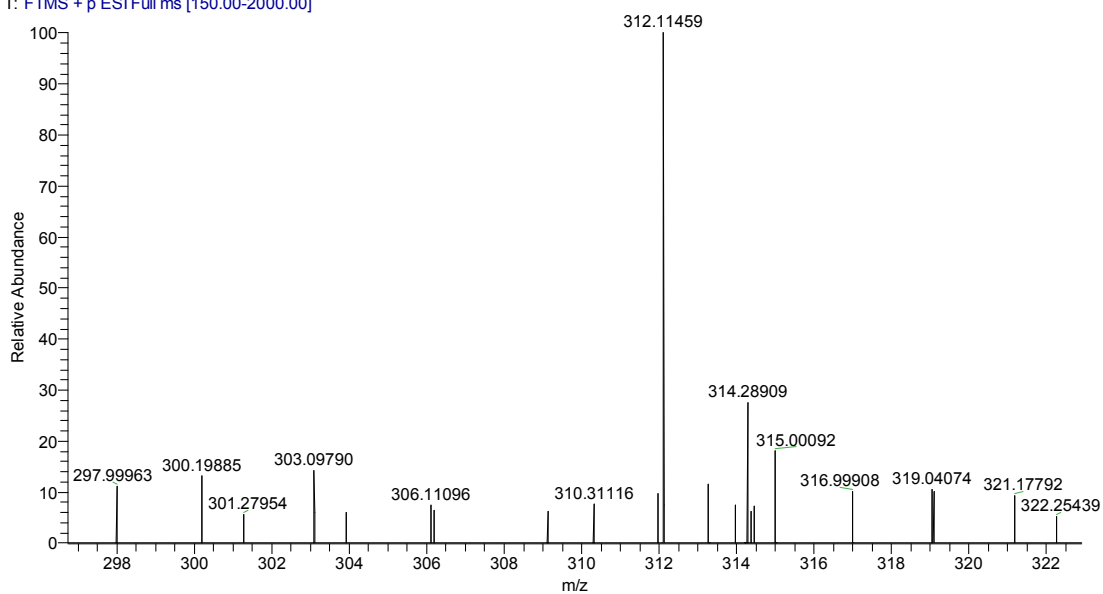

4o HRMS (ESI) m/z calcd for  $C_{14}H_{13}Cl_2O_2S^+$  (M+H)<sup>+</sup> 315.00078, found 315.00113.

119 #6 RT: 0.06 AV: 1 NL: 3.92E6  
T: FTMS + p ESI Full ms [150.00-2000.00]

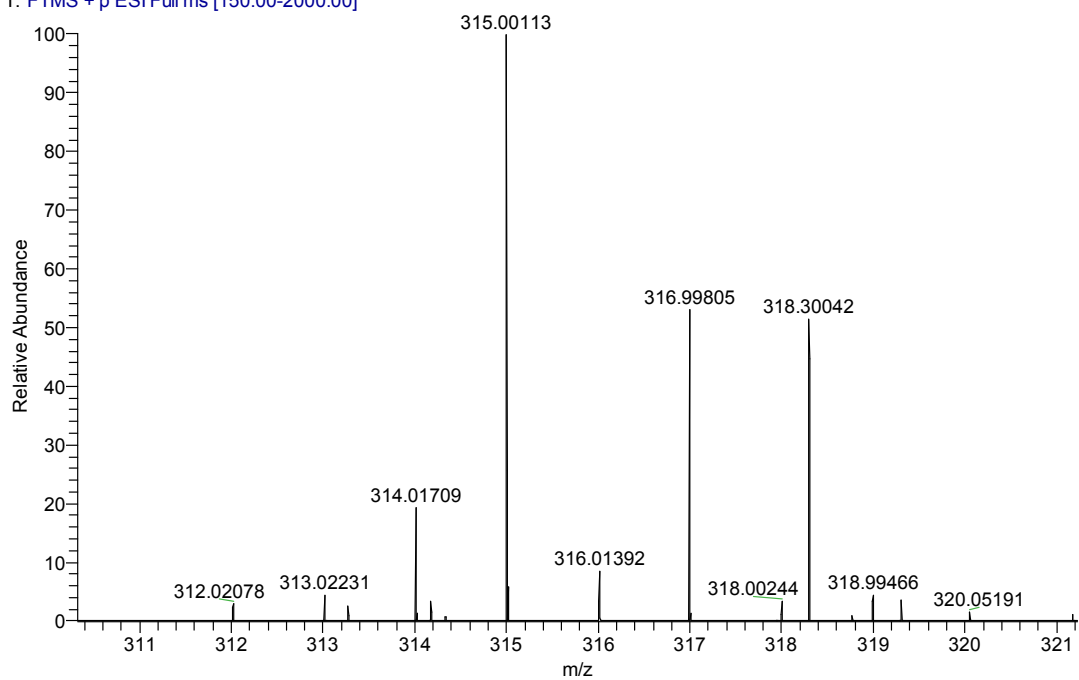

119 #6 RT: 0.06 AV: 1 NL: 2.61E7  
T: FTMS + p ESI Full ms [150.00-2000.00]

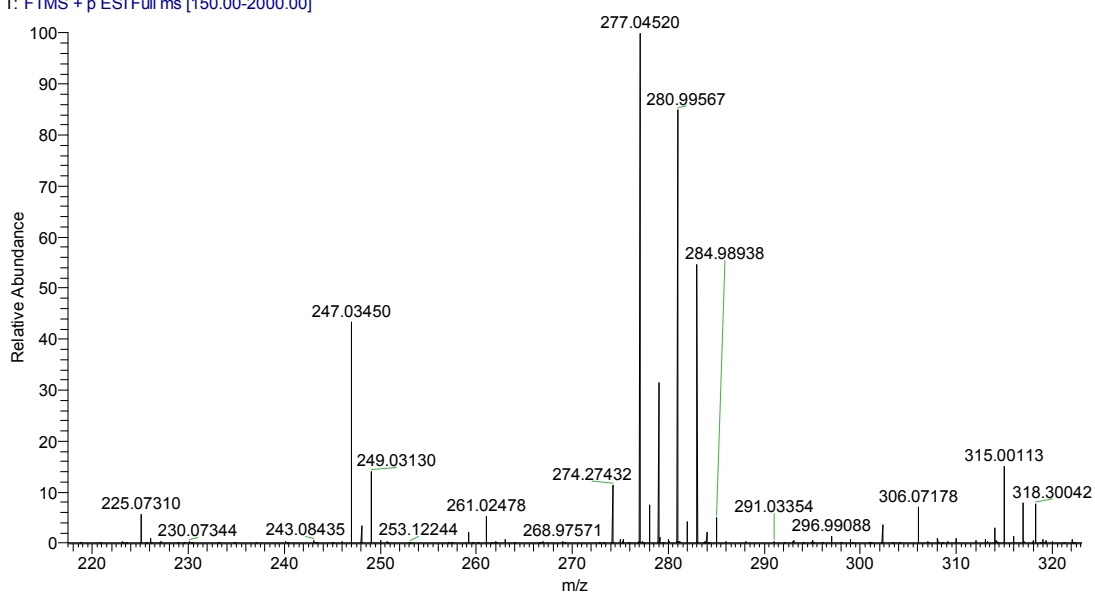

4q. HRMS (ESI) m/z calcd for  $C_{14}H_{13}ClBrO_2S^+$  (M+H)<sup>+</sup> 358.95027, found 358.95047.

104\_180906172255 #43 RT: 0.63 AV: 1 NL: 2.91E6  
T: FTMS + p ESI Full ms [150.00-2000.00]

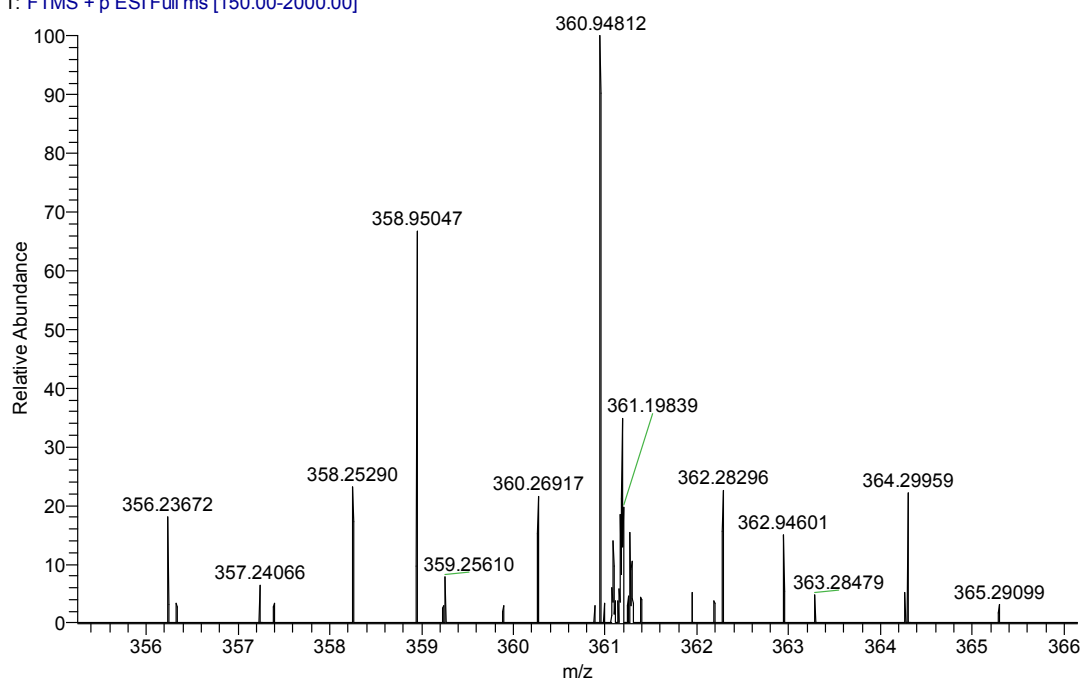

**4r.** HRMS (ESI) m/z calcd for  $C_{15}H_{13}ClNO_2S^+$  (M+H)<sup>+</sup> 306.03500, found 306.03519.

105 #40 RT: 0.60 AV: 1 NL: 4.64E7  
T: FTMS + p ESI Full ms [150.00-2000.00]

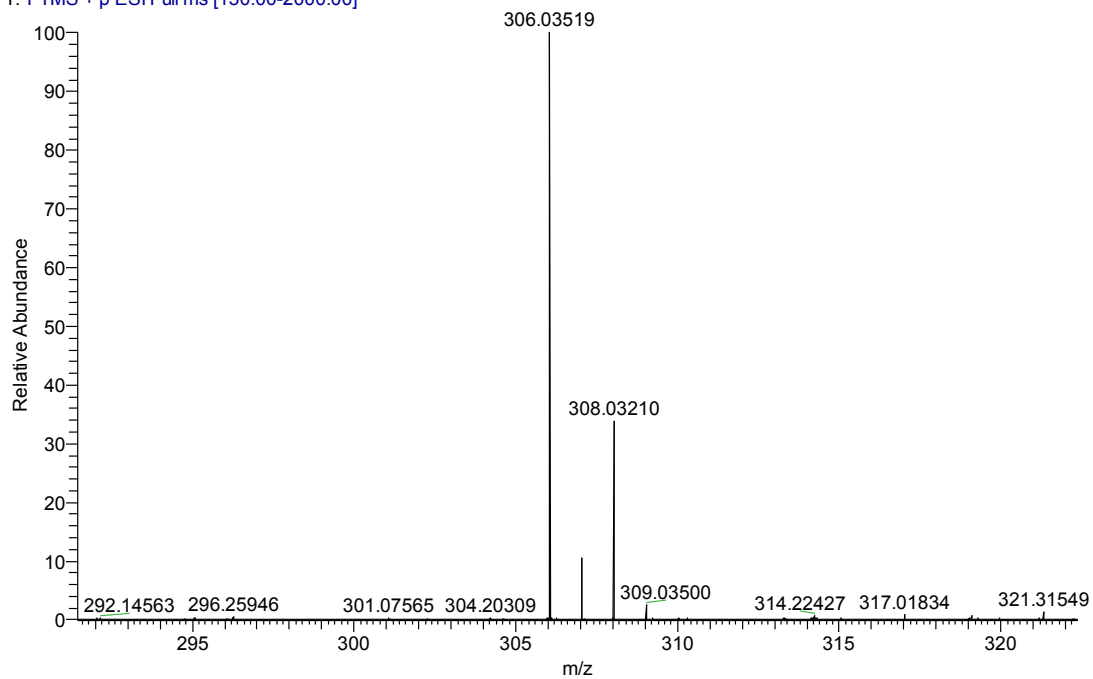

105 #34 RT: 0.51 AV: 1 NL: 6.25E7  
T: FTMS + p ESI Full ms [150.00-2000.00]

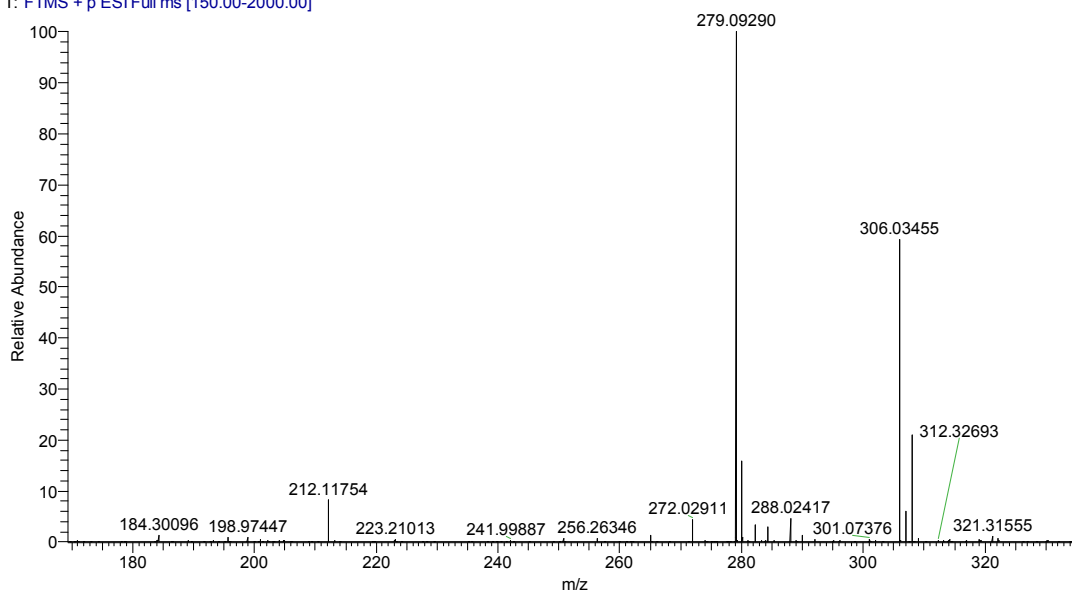

**4s.** HRMS (ESI) m/z calcd for  $C_{18}H_{16}ClO_2S^+$  (M+H)<sup>+</sup> 331.05540, found 331.05569.

106 #36 RT: 0.55 AV: 1 NL: 4.45E6  
T: FTMS + p ESI Full ms [150.00-2000.00]

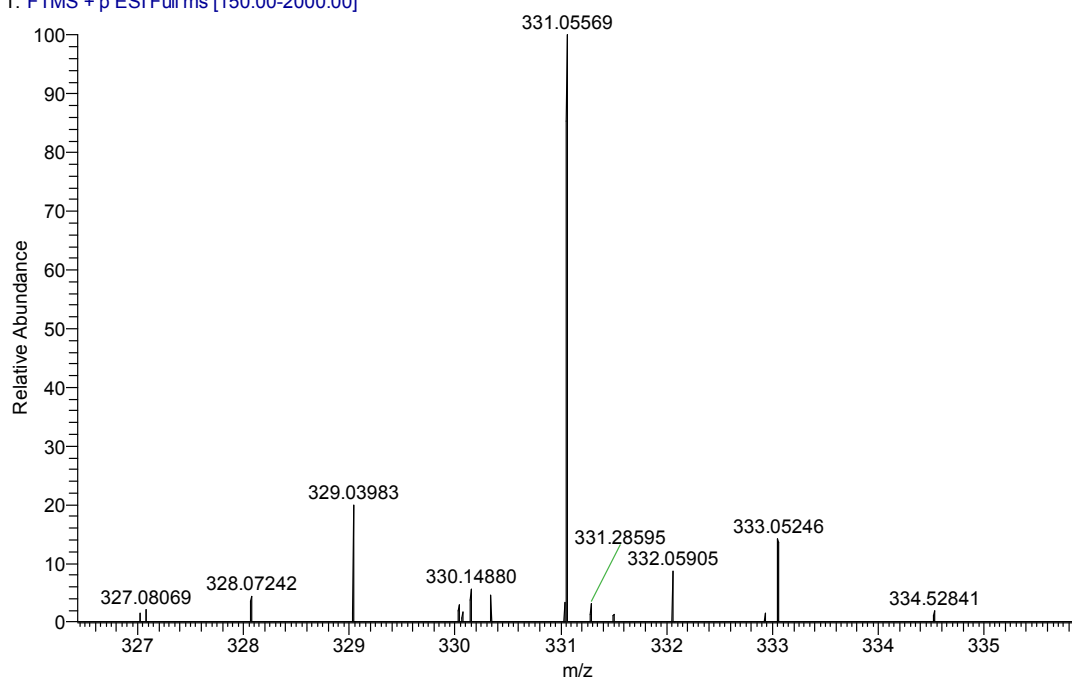

**4t.** HRMS (ESI) m/z calcd for  $C_{14}H_{20}ClO_2S^+$  (M+H)<sup>+</sup> 287.08670, found 287.08643.

107 #35 RT: 0.53 AV: 1 NL: 1.04E8  
T: FTMS + p ESI Full ms [150.00-2000.00]

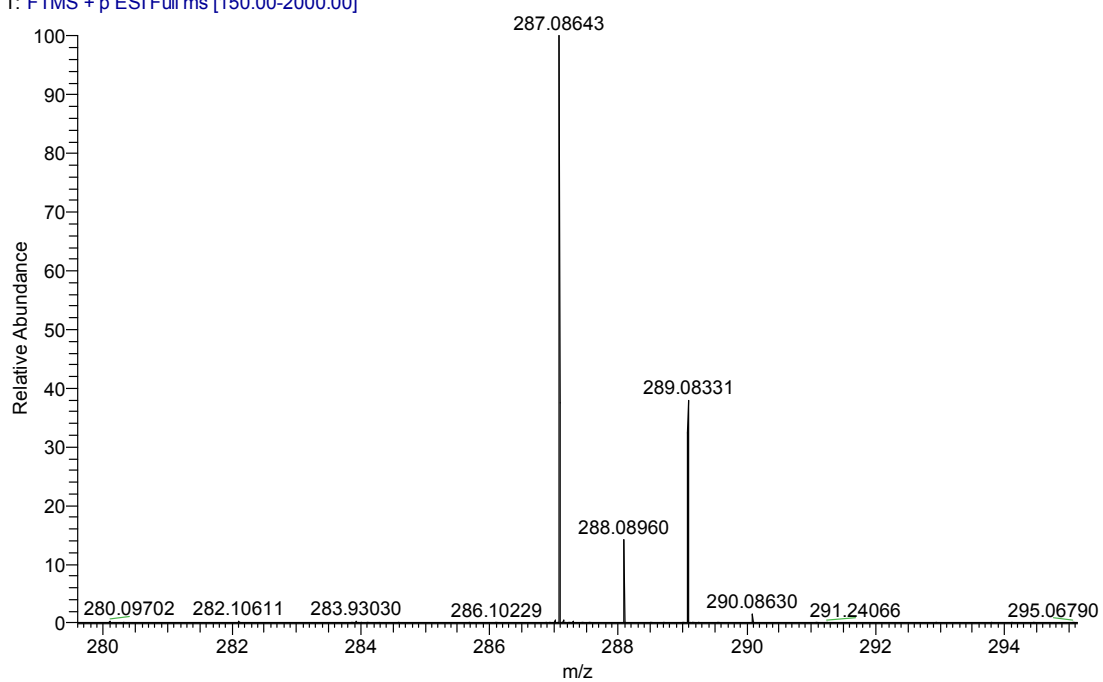

107 #30 RT: 0.45 AV: 1 NL: 9.64E7  
T: FTMS + p ESI Full ms [150.00-2000.00]

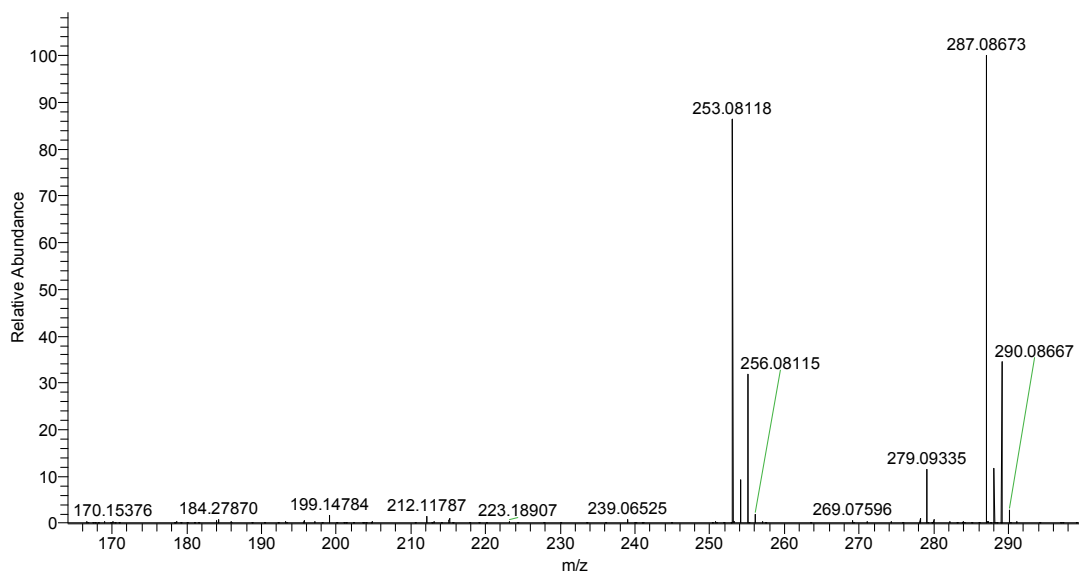

7. HRMS (ESI) m/z calcd for  $C_{18}H_{18}ClO_3S^+$  (M+H)<sup>+</sup> 349.06597, found 349.06577.

108 #44 RT: 0.68 AV: 1 NL: 2.57E5  
T: FTMS + p ESI Full ms [150.00-2000.00]

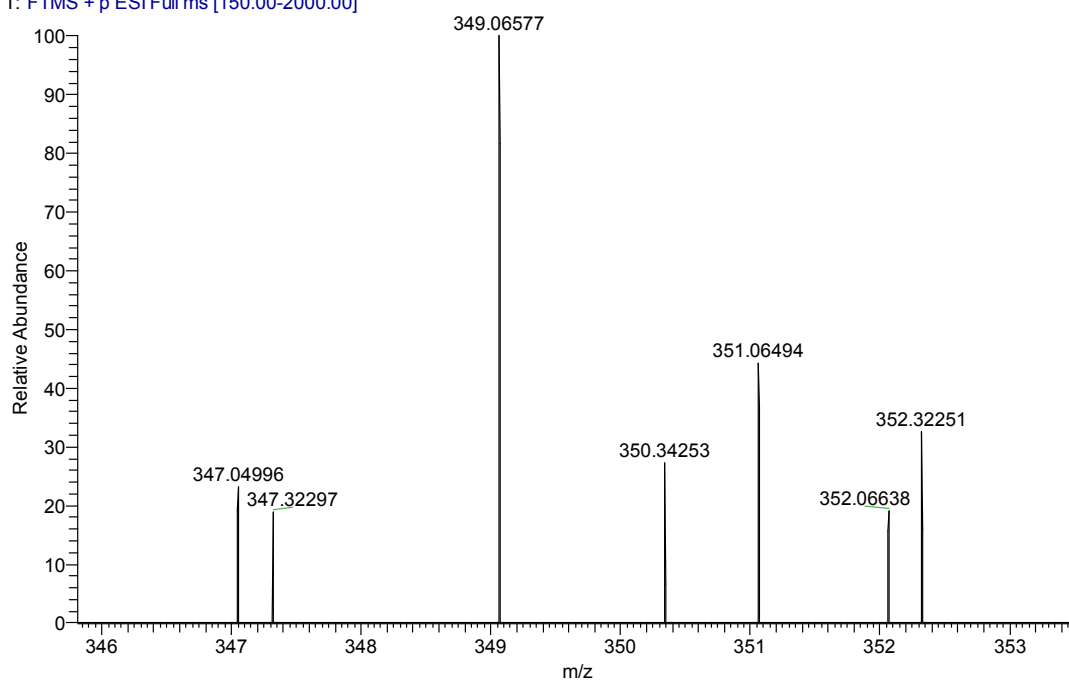

10. HRMS (ESI) m/z calcd for  $C_{18}H_{16}ClO_2S^+$  (M+H)<sup>+</sup> 363.02748, found 363.02737.

109 #32 RT: 0.49 AV: 1 NL: 8.00E4  
T: FTMS + p ESI Full ms [150.00-2000.00]

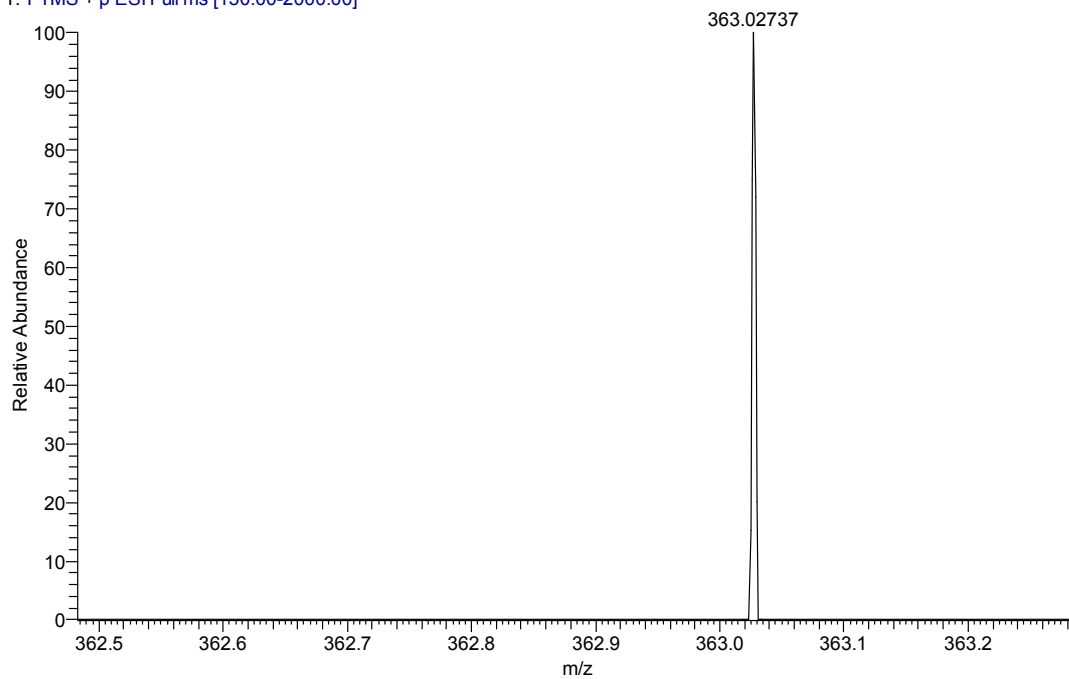

109#32 RT: 0.49 AV: 1 NL: 1.17E6  
T: FTMS + p ESI Full ms [150.00-2000.00]

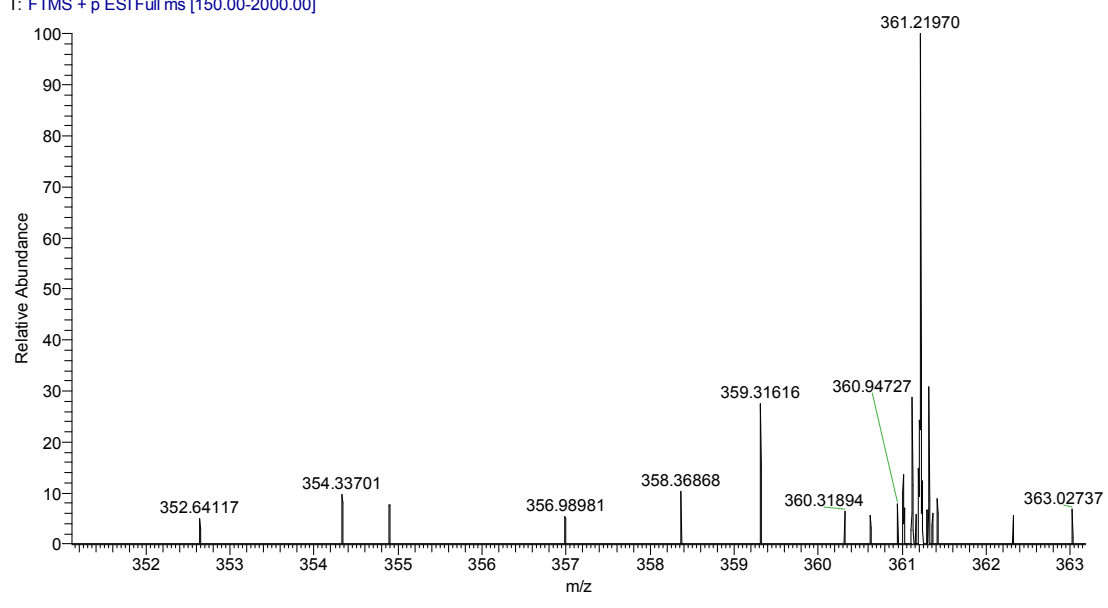

Supplement: d0ob01349h1.pdf [file d0ob01349h1.pdf]
