# Supplementary material for: Photoredox β-thiol-α-carbonylation of enones accompanied by unexpected Csp2–C(CO) bond cleavage
Source: Royal Society of Chemistry journal article supplement (doi:10.1039/d0ob01349h), 2020-01-01

**NO : HRMS180906XT008**

## **HRMS report**

**Instrument :**

Thermo Scientific LTQ Orbitrap XL

**Ionic source : ESI Result :**

**4b** HRMS (ESI) m/z calcd for C<sub>15</sub>H<sub>16</sub>O<sub>2</sub>Na (M+O+Na)<sup>+</sup>283.0763, found 283.0765.

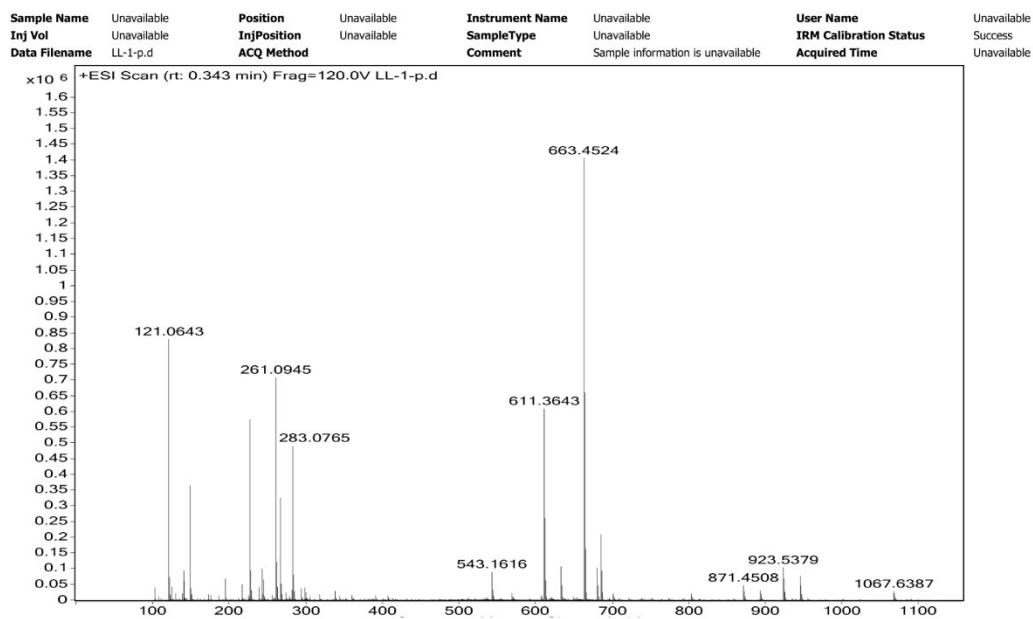

**4c.** HRMS (ESI) m/z calcd for C<sub>16</sub>H<sub>17</sub>O<sub>3</sub>S (M+O+H)<sup>+</sup> 289.08984, found 289.08957.

98 #26 RT: 0.35 AV: 1 NL: 3.17E6  
T: FTMS + p ESI Full ms [150.00-2000.00]

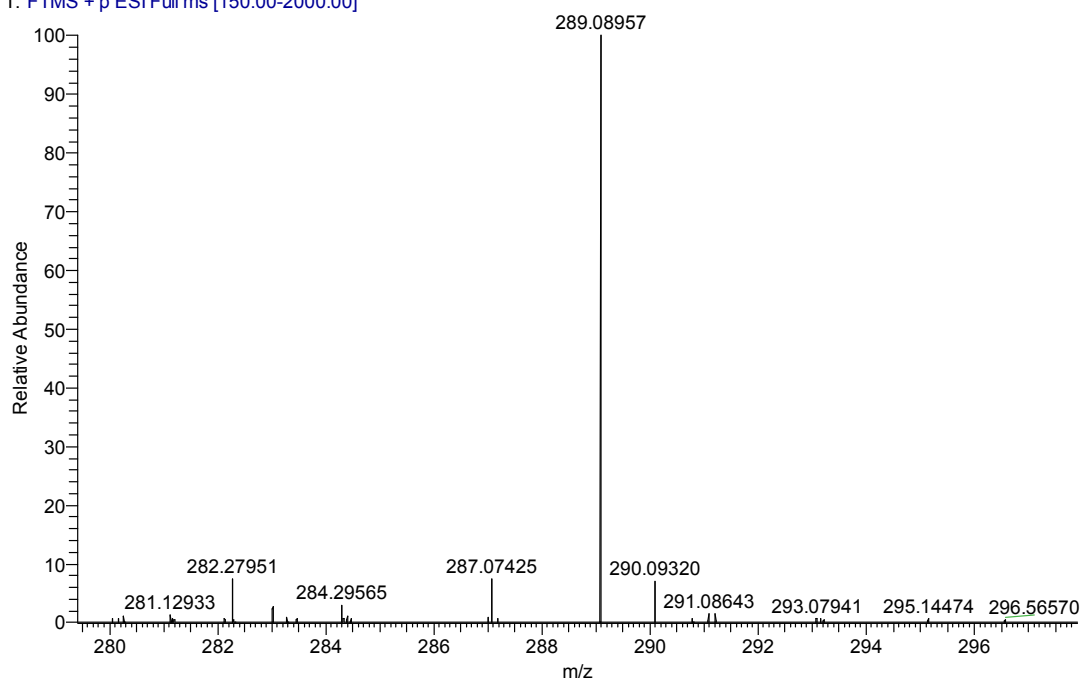

**4e** HRMS (ESI)  $m/z$  calcd for  $C_{18}H_{22}OSNa$  ( $M+Na$ )<sup>+</sup> 309.1289, found 309.1280;  
calcd for  $C_{18}H_{22}O_2SNa$  ( $M+O+Na$ )<sup>+</sup> 325.1238, found 325.1229; calcd for  $C_{18}H_{23}O_2$   
( $M+O+H$ )<sup>+</sup>: 303.1419, found 303.1412.

1-22 #8 RT: 0.07 AV: 1 NL: 9.39E7  
T: FTMS + p ESI Full lock ms [80.0000-1200.0000]

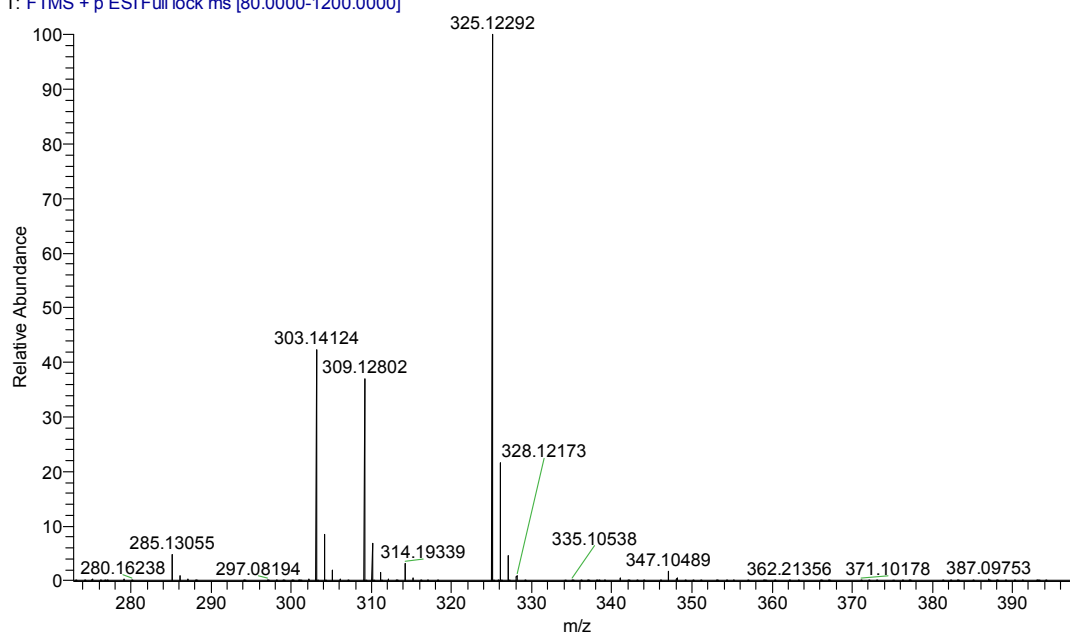

**4i** HRMS (ESI)  $m/z$  calcd for  $C_{14}H_{13}ClFO_2S^+$  ( $M+O+H$ )<sup>+</sup> 299.03033, found 299.03043.

125 #5 RT: 0.05 AV: 1 NL: 2.13E5  
T: FTMS + p ESI Full ms [150.00-2000.00]

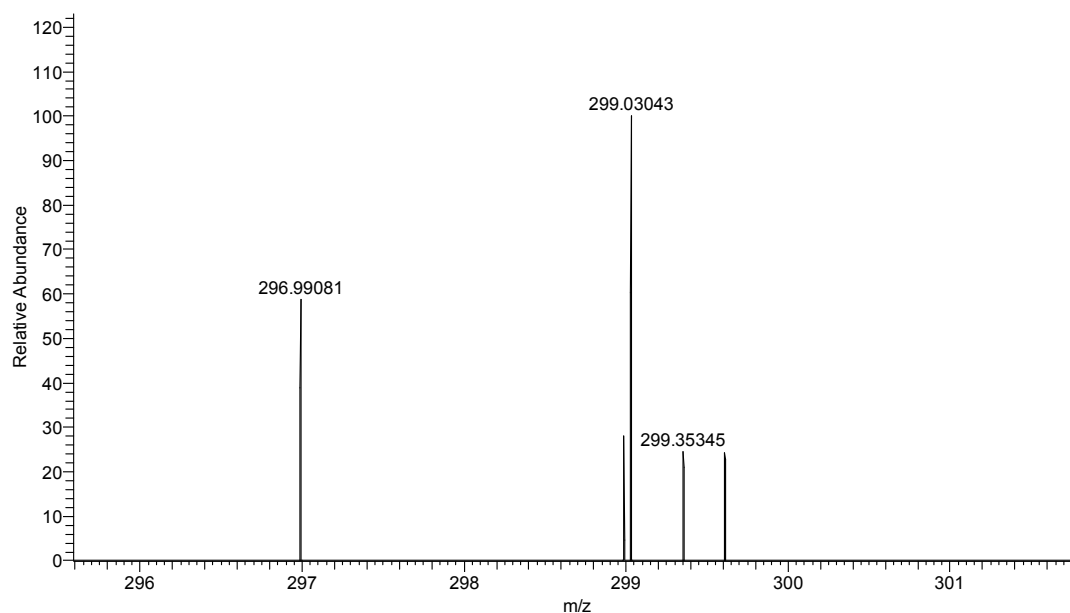

**4j** HRMS (ESI) m/z calcd for  $C_{15}H_{16}ClO_2S^+$  (M+O+H)<sup>+</sup> 295.05540, found 295.05576.

124 #12 RT: 0.15 AV: 1 NL: 1.66E6  
T: FTMS + p ESI Full ms [150.00-2000.00]

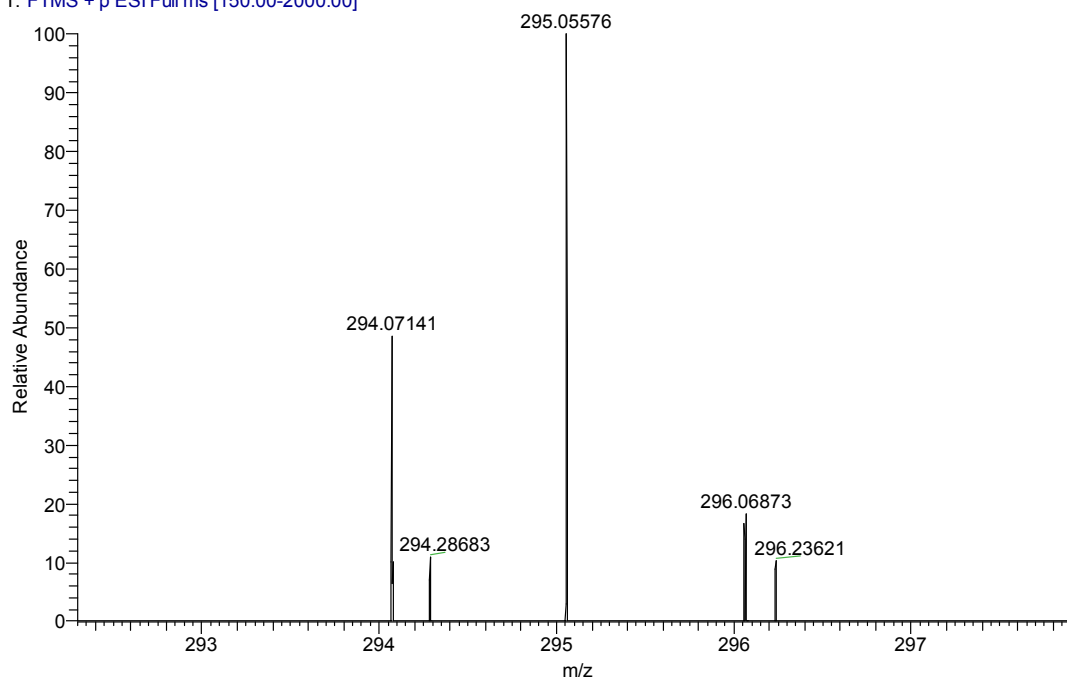

**4k.** HRMS (ESI) m/z calcd for  $C_{18}H_{22}ClO_2S^+$  (M+O+H)<sup>+</sup> 337.10235, found 337.10205.

100\_180906171755 #33 RT: 0.50 AV: 1 NL: 1.12E7  
T: FTMS + p ESI Full ms [150.00-2000.00]

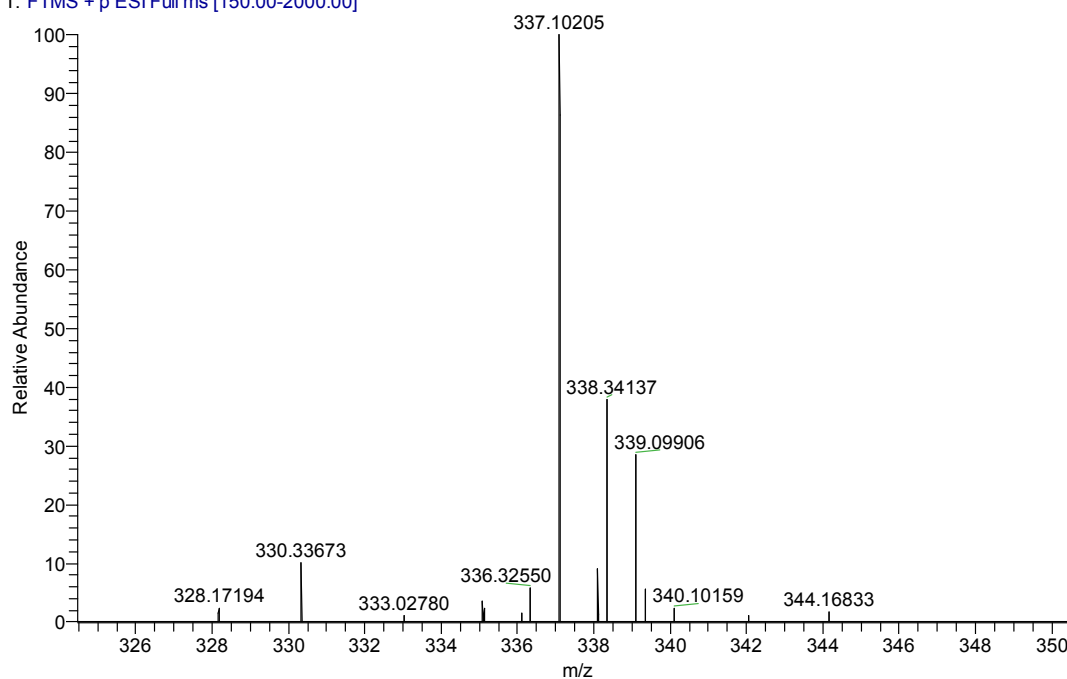

**4l.** HRMS (ESI)  $m/z$  calcd for  $C_{14}H_{13}Cl_2O_2S^+$  (M+O+H)<sup>+</sup> 315.00078, found 315.00125.

101\_180906171913 #35 RT: 0.52 AV: 1 NL: 1.89E6  
T: FTMS + p ESI Full ms [150.00-2000.00]

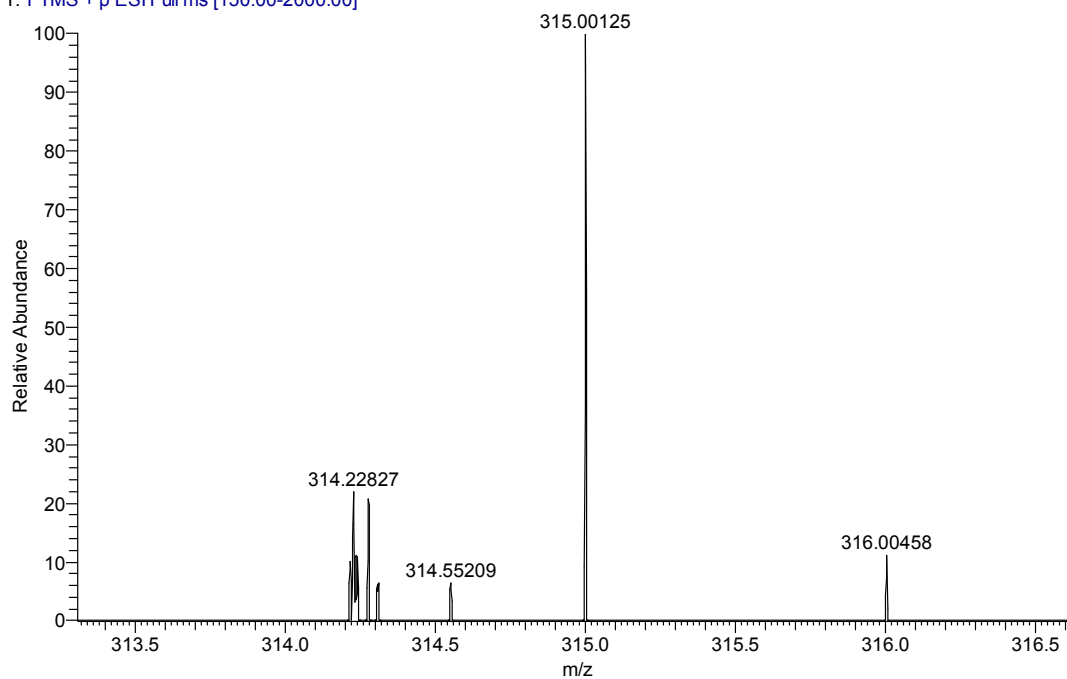

**4m** HRMS (ESI)  $m/z$  calcd for  $C_{15}H_{16}ClO_2S^+$  (M+O+H)<sup>+</sup> 295.05540, found 295.05576.

124 #12 RT: 0.15 AV: 1 NL: 1.66E6  
T: FTMS + p ESI Full ms [150.00-2000.00]

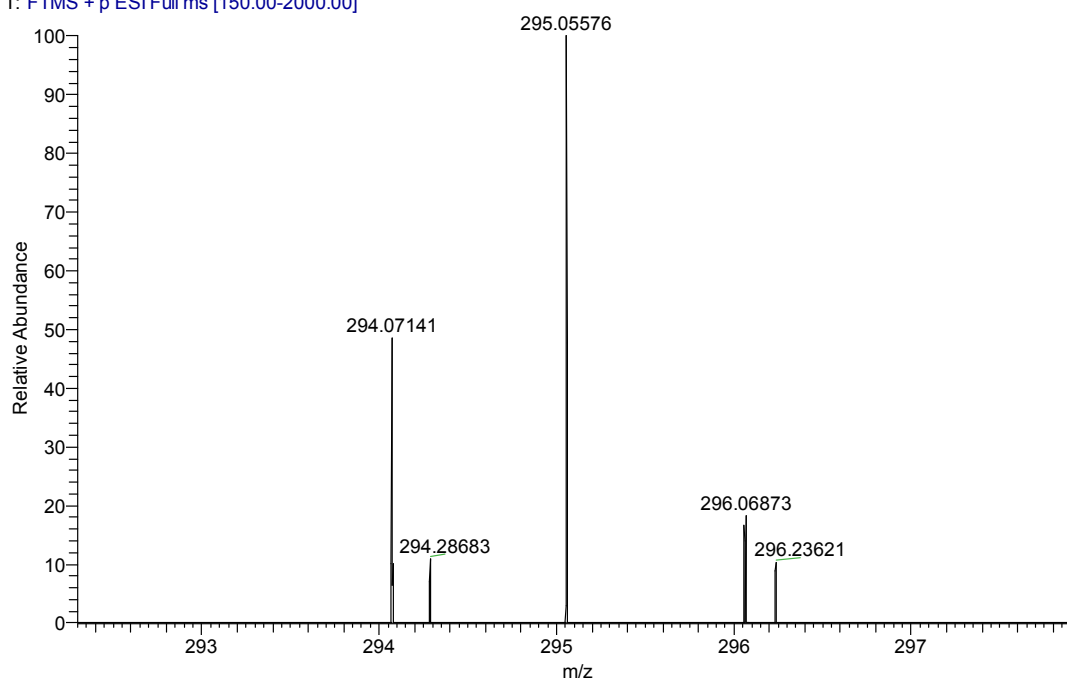

**4n.** HRMS (ESI) m/z calcd for  $C_{14}H_{13}Cl_2O_2S^+$  (M+O+H)<sup>+</sup> 315.00078, found 315.00055.

103\_180906172141 #2 RT: 0.01 AV: 1 NL: 7.88E5  
T: FTMS + p ESI Full ms [150.00-2000.00]

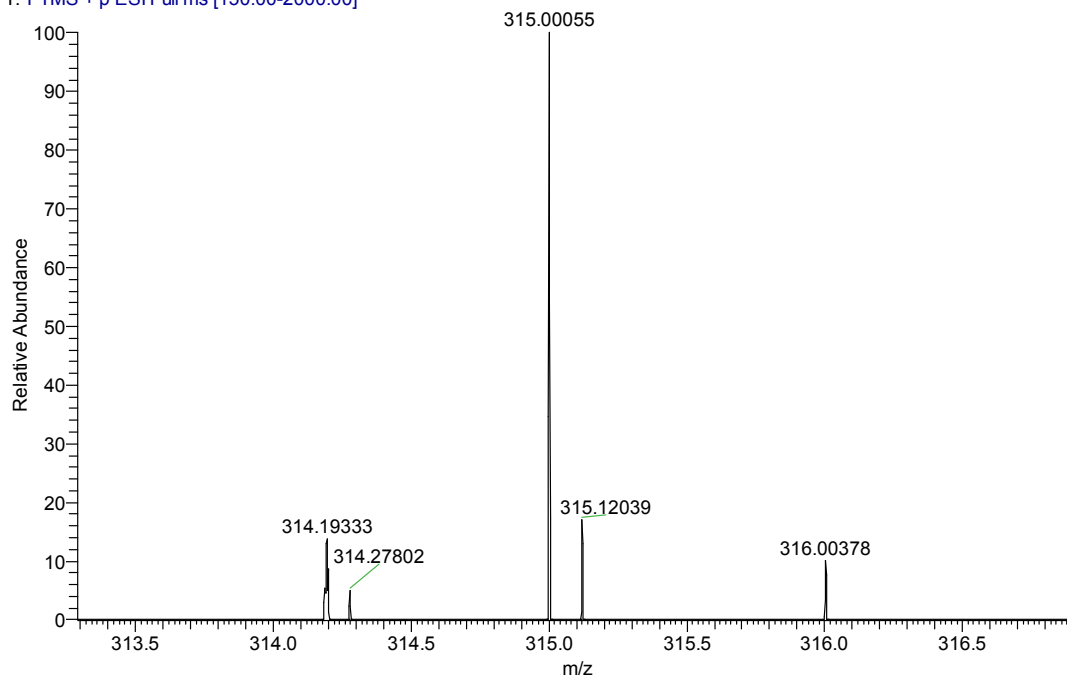

**4o** HRMS (ESI) m/z calcd for  $C_{14}H_{13}Cl_2O_2S^+$  (M+O+H)<sup>+</sup> 315.00078, found

315.00113.

119 #6 RT: 0.06 AV: 1 NL: 3.92E6  
T: FTMS + p ESI Full ms [150.00-2000.00]

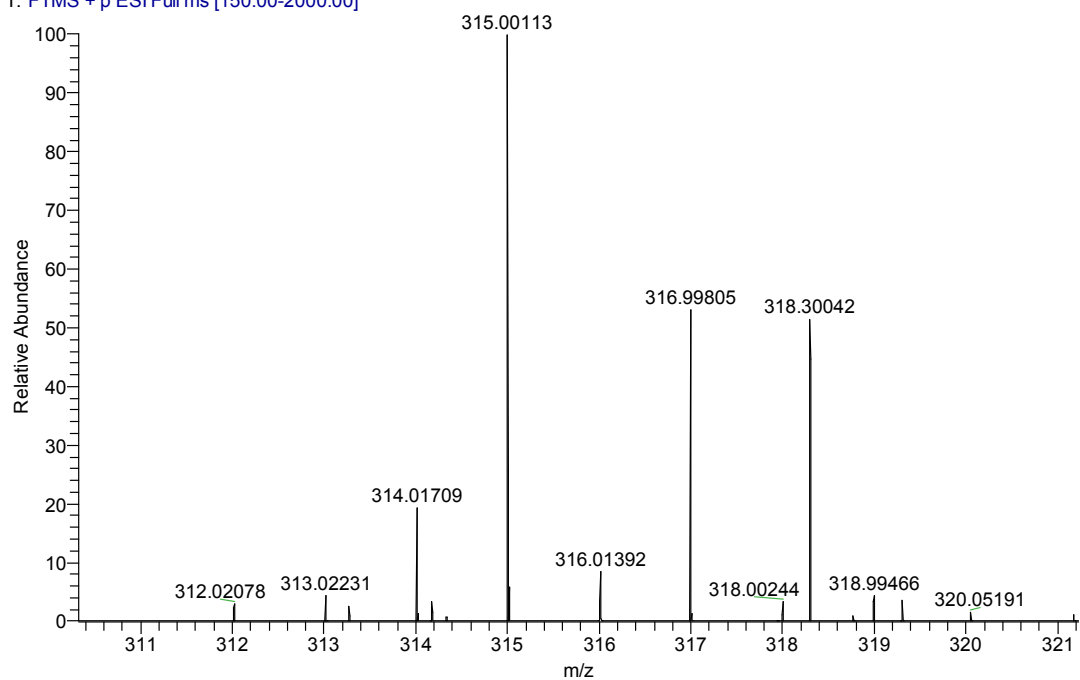

**4p.** HRMS (ESI) m/z calcd for  $C_{14}H_{13}ClBrO_2S^+$  (M+O+H)<sup>+</sup> 358.95027, found 358.95047.

104\_180906172255 #43 RT: 0.63 AV: 1 NL: 2.91E6  
T: FTMS + p ESI Full ms [150.00-2000.00]

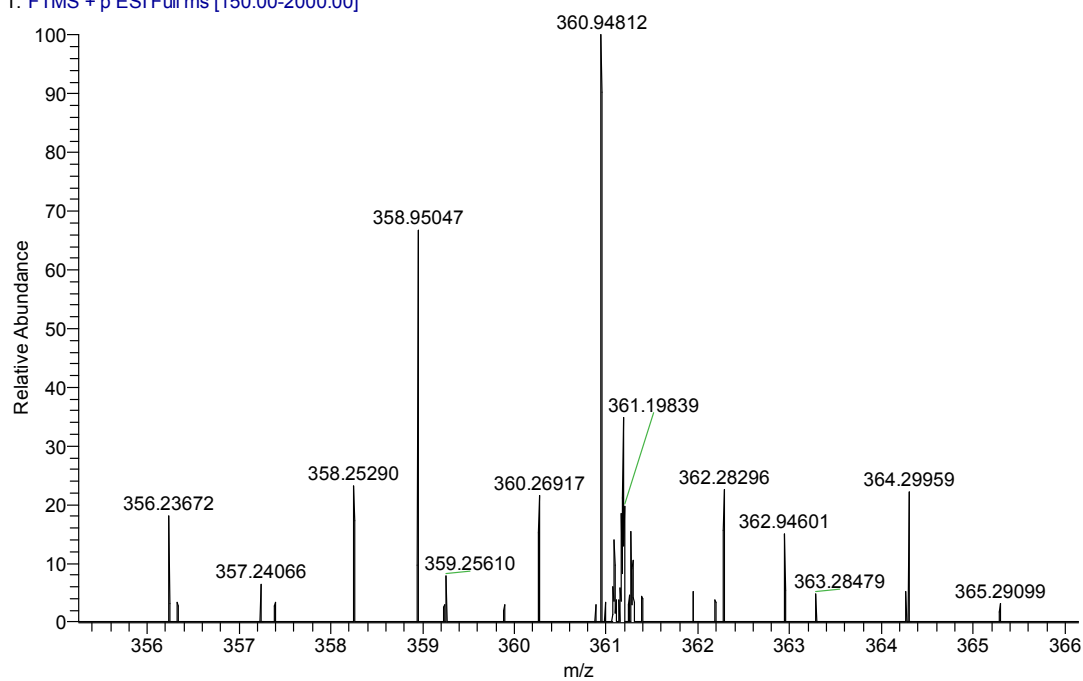

**4q.** HRMS (ESI)  $m/z$  calcd for  $C_{15}H_{13}ClNO_2S^+$  (M+O+H)<sup>+</sup> 306.03500, found 306.03519.

105 #40 RT: 0.60 AV: 1 NL: 4.64E7  
T: FTMS + p ESI Full ms [150.00-2000.00]

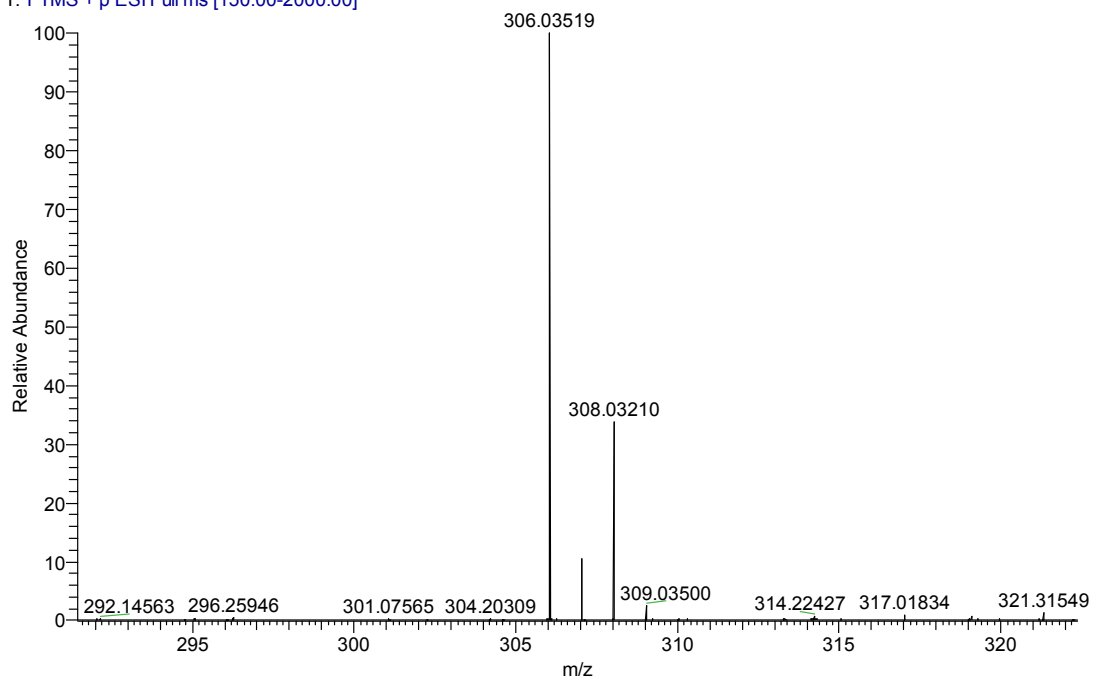

**4r.** HRMS (ESI)  $m/z$  calcd for  $C_{18}H_{16}ClO_2S^+$  (M+O+H)<sup>+</sup> 331.05540, found 331.05569.

106 #36 RT: 0.55 AV: 1 NL: 4.45E6  
T: FTMS + p ESI Full ms [150.00-2000.00]

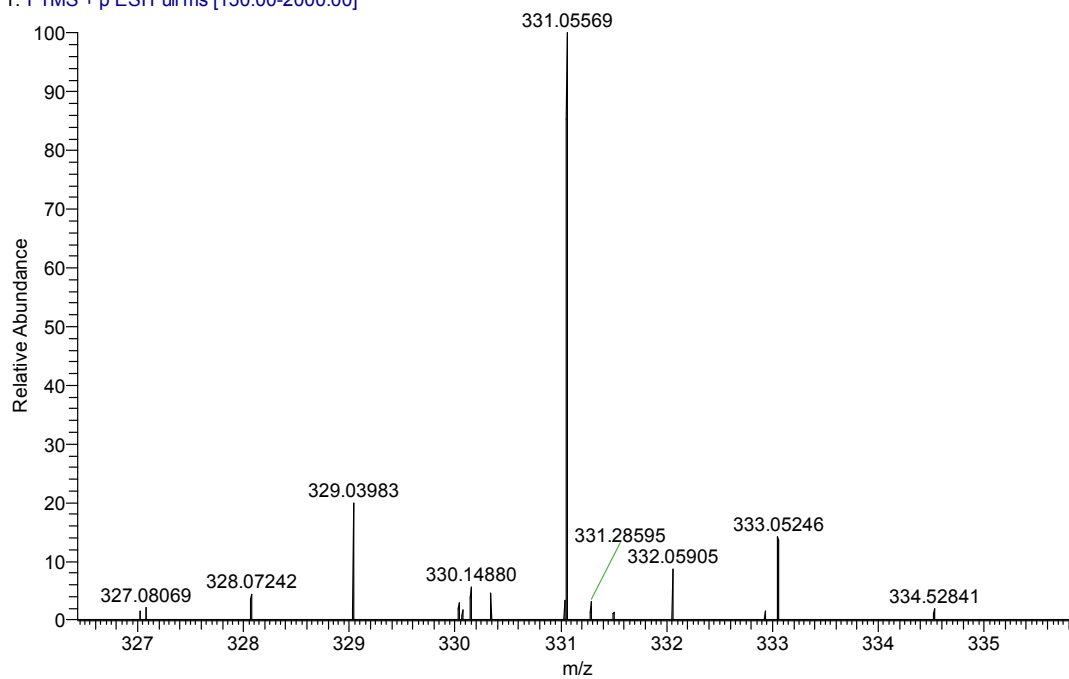



**4t.** HRMS (ESI) m/z calcd for  $C_{14}H_{20}ClO_2S^+$  (M+O+H)<sup>+</sup> 287.08670, found 287.08643.

107 #35 RT: 0.53 AV: 1 NL: 1.04E8  
T: FTMS + p ESI Full ms [150.00-2000.00]

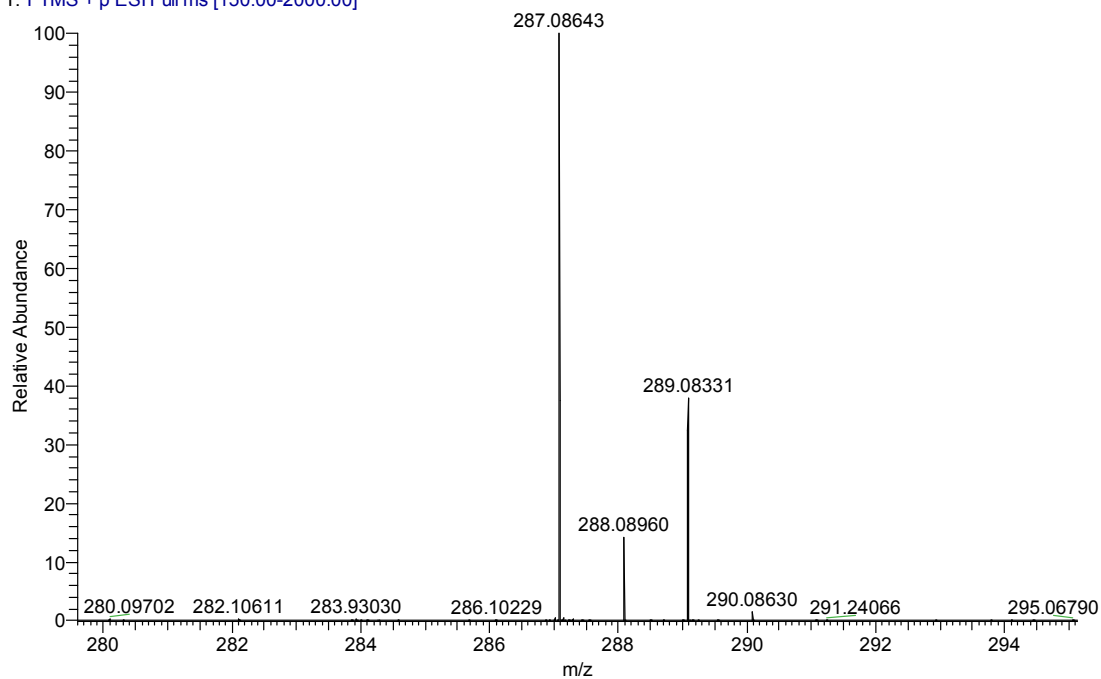

**6** HRMS (ESI) m/z calcd for  $C_{15}H_{16}ClO_2S^+$  (M+O+H)<sup>+</sup> 295.05540, found 295.05576.

124 #12 RT: 0.15 AV: 1 NL: 1.66E6  
T: FTMS + p ESI Full ms [150.00-2000.00]

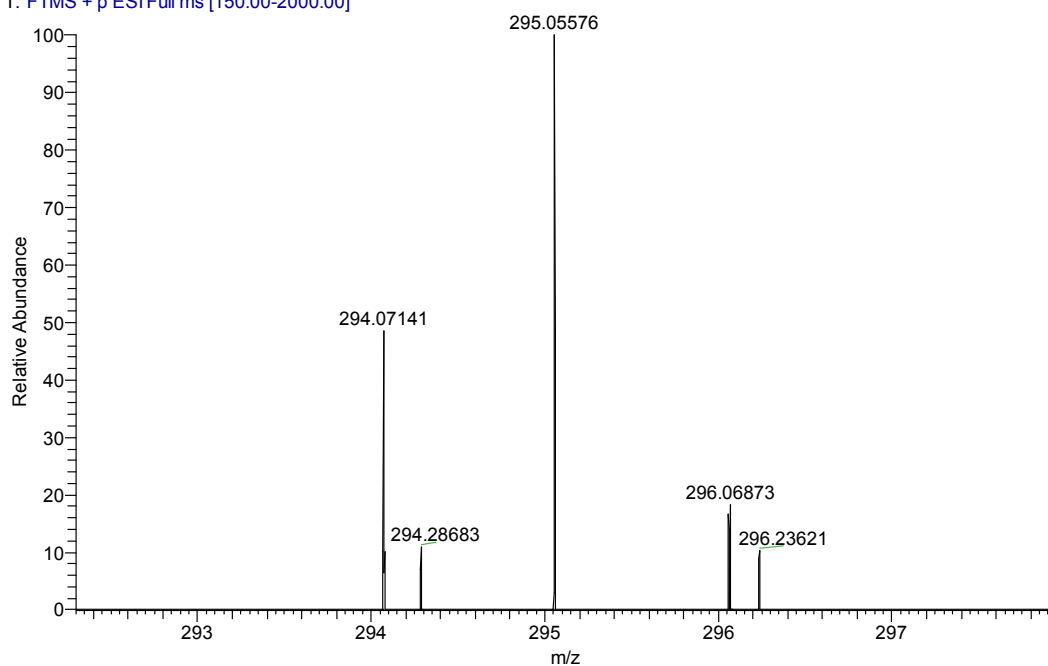

7. HRMS (ESI) m/z calcd for  $C_{18}H_{18}ClO_3S^+$  (M+O+H)<sup>+</sup> 349.06597, found 349.06577.

108 #44 RT: 0.68 AV: 1 NL: 2.57E5  
T: FTMS + p ESI Full ms [150.00-2000.00]

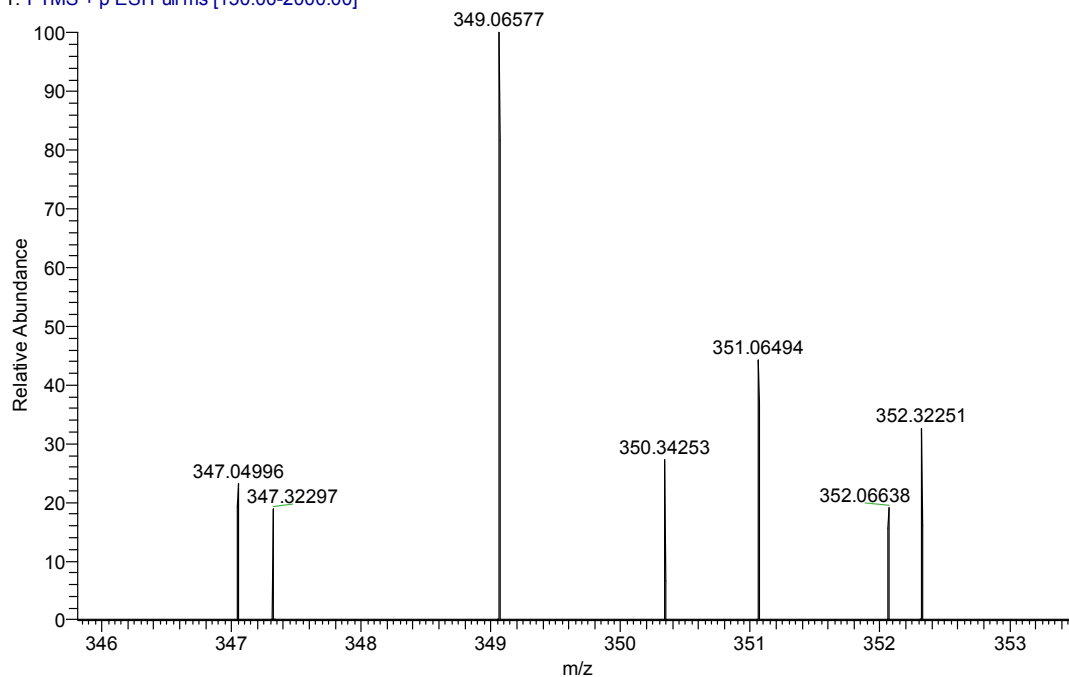

8 HRMS (ESI) m/z calcd for  $C_{14}H_{13}ClOSNa^+$  (M+Na)<sup>+</sup> 287.0268, found 287.0274

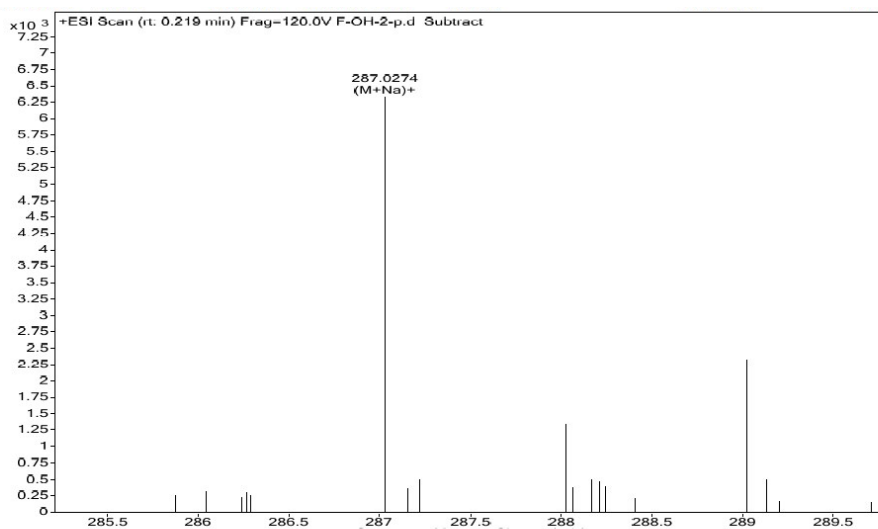

9 HRMS (ESI) m/z M+H<sup>+</sup> calcd for C<sub>20</sub>H<sub>19</sub>ClNS<sup>+</sup> 340.0921, found 349.0932

|             |             |                        |                                   |                 |             |
|-------------|-------------|------------------------|-----------------------------------|-----------------|-------------|
| Sample Name | Unavailable | Position               | Unavailable                       | Instrument Name | Unavailable |
| User Name   | Unavailable | Inj Vol                | Unavailable                       | InjPosition     | Unavailable |
| Sample Type | Unavailable | IRM Calibration Status | Success                           | Data Filename   | 1.p.d       |
| ACQ Method  |             | Comment                | Sample information is unavailable | Acquired Time   | Unavailable |

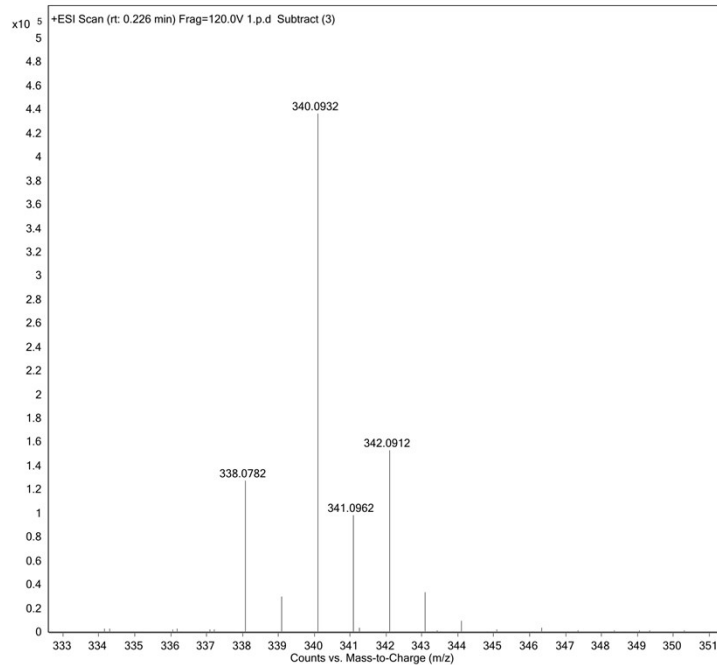

10. HRMS (ESI) m/z calcd for C<sub>18</sub>H<sub>16</sub>ClO<sub>2</sub>S<sup>+</sup> (M+O+H)<sup>+</sup> 363.02748, found

363.02737.

109 #32 RT: 0.49 AV: 1 NL: 8.00E4  
T: FTMS + p ESI Full ms [150.00-2000.00]

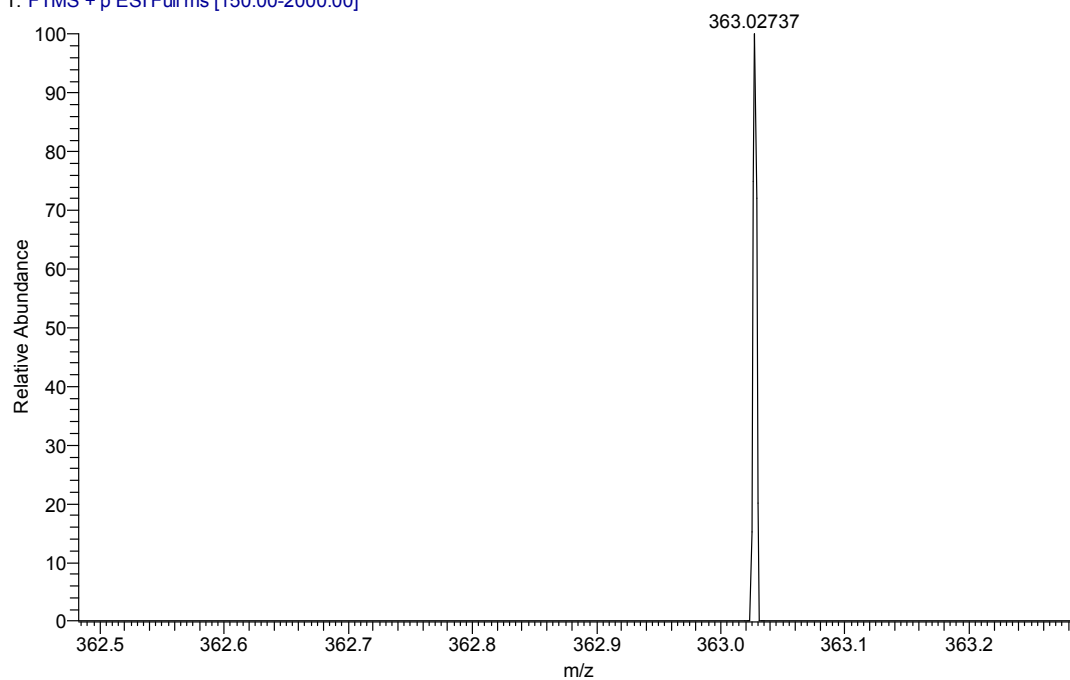

Supplement: d0ob01349h3.pdf [file d0ob01349h3.pdf]
