# Supplementary material for: Photoredox β-thiol-α-carbonylation of enones accompanied by unexpected Csp2–C(CO) bond cleavage
Source: Royal Society of Chemistry journal article supplement (doi:10.1039/d0ob01349h), 2020-01-01
Supplement: d0ob01349h2.pdf [file d0ob01349h2.pdf]

编号 : HRMS200811XT008

## HRMS report

**Instrument :**

Thermo Scientific Q Exactive

**Ionic source : ESI**

**Newly synthesized compound 4e using our method HRMS (ESI) m/z calcd for**

$C_{18}H_{22}OSNa^+$  (M+Na)<sup>+</sup> 309.12836, found 309.12802.

1-22 #8 RT: 0.07 AV: 1 NL: 3.47E7  
T: FTMS + p ESI Full lock ms [80.0000-1200.0000]

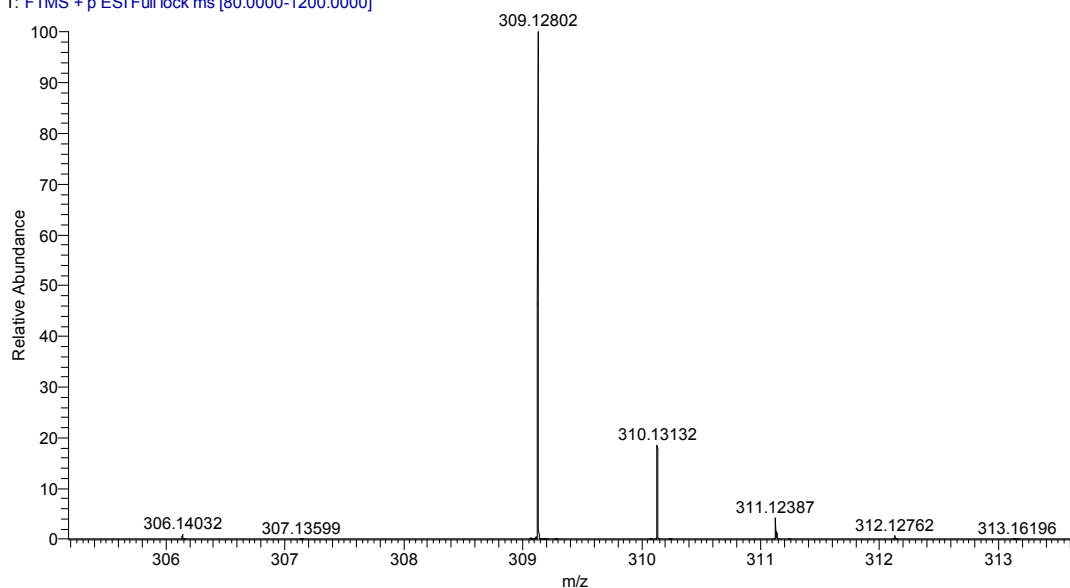

1-22 #8 RT: 0.07 AV: 1 NL: 9.39E7  
T: FTMS + p ESI Full lock ms [80.0000-1200.0000]

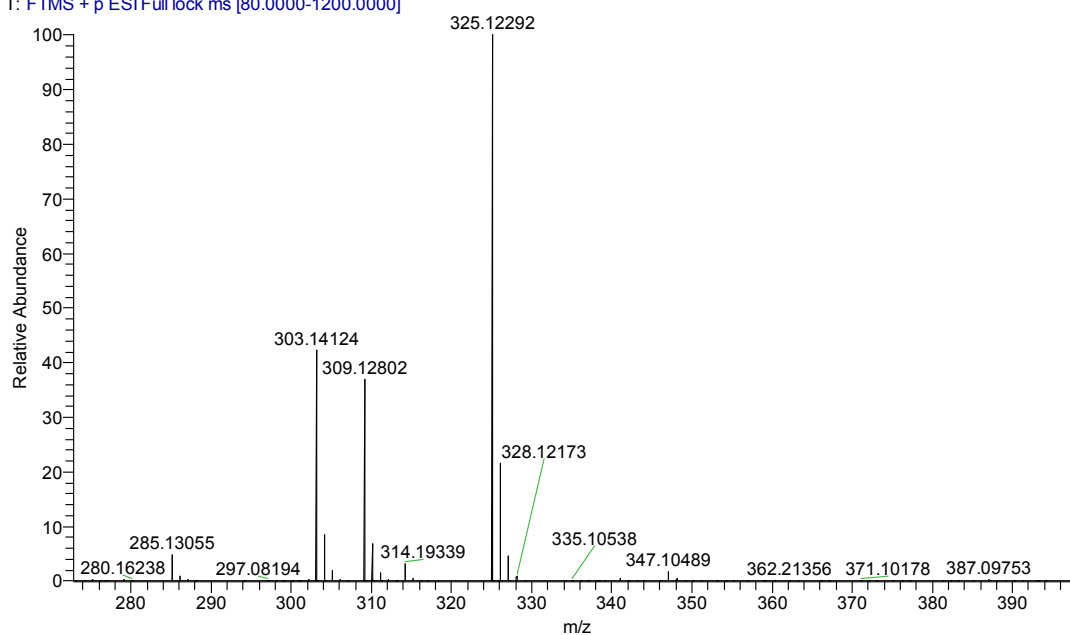

Newly synthesized compound 4e using known method HRMS (ESI) m/z calcd

for  $C_{18}H_{22}OSNa^+$  ( $M+Na$ ) $^+$  309.12836, found 309.12802.

1-24 #9 RT: 0.07 AV: 1 NL: 4.35E7  
T: FTMS + p ESI Full lock ms [80.0000-1200.0000]

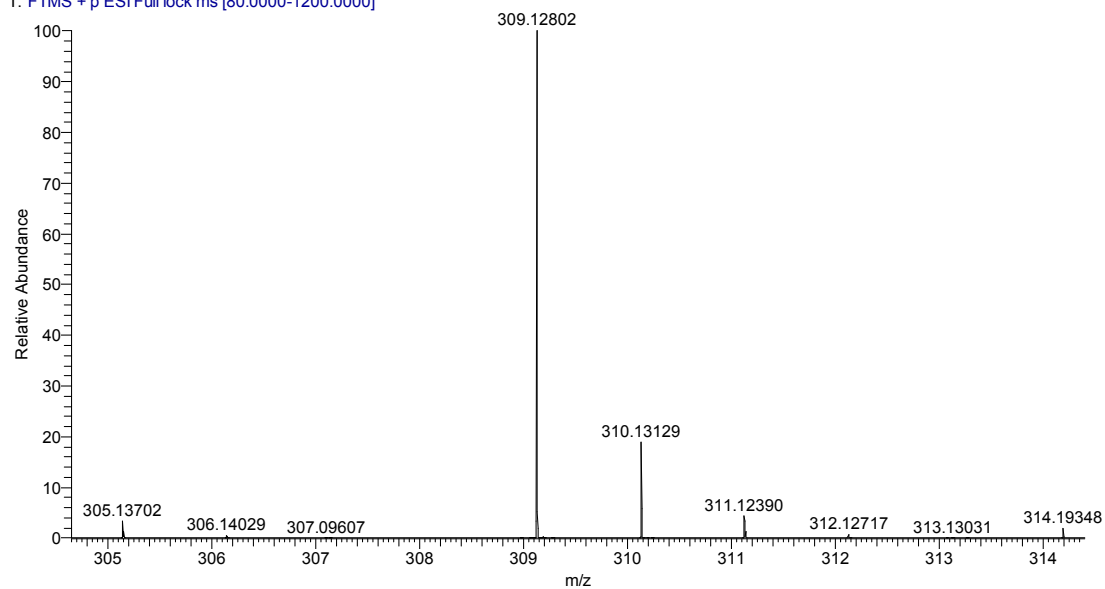

1-24 #9 RT: 0.07 AV: 1 NL: 9.03E7  
T: FTMS + p ESI Full lock ms [80.0000-1200.0000]

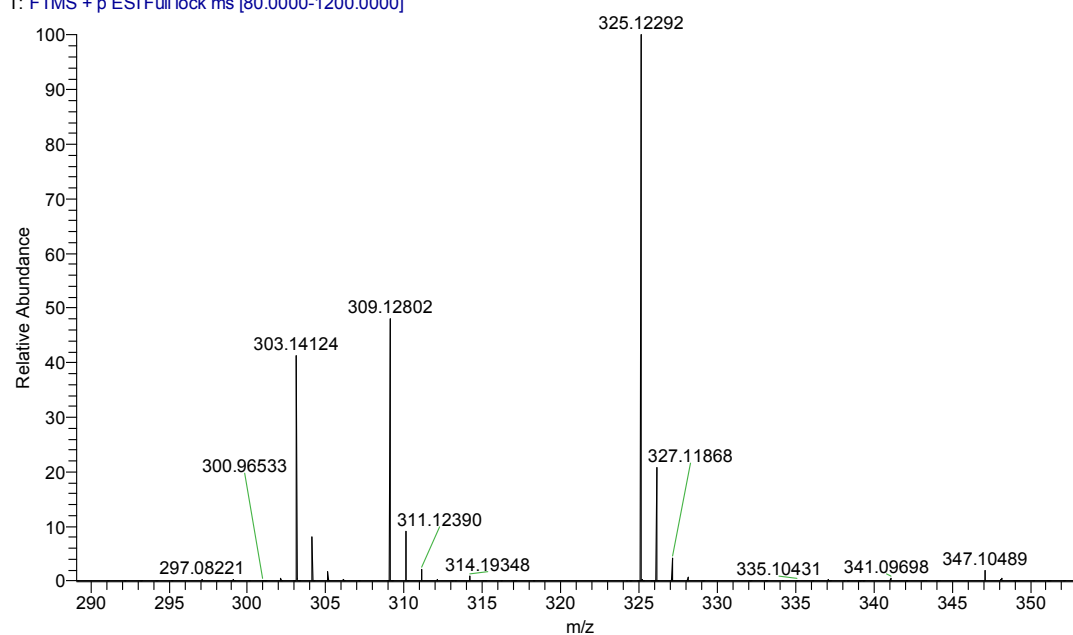

## Compound 4e synthesized almost 1 year ago

HRMS (ESI) m/z calcd for  $C_{18}H_{22}OSNa^+$  (M+Na)<sup>+</sup> 309.12836, found 309.12863.

1-26 #27 RT: 0.19 AV: 1 NL: 1.18E5  
T: FTMS + p ESI Full lock ms [80.0000-1200.0000]

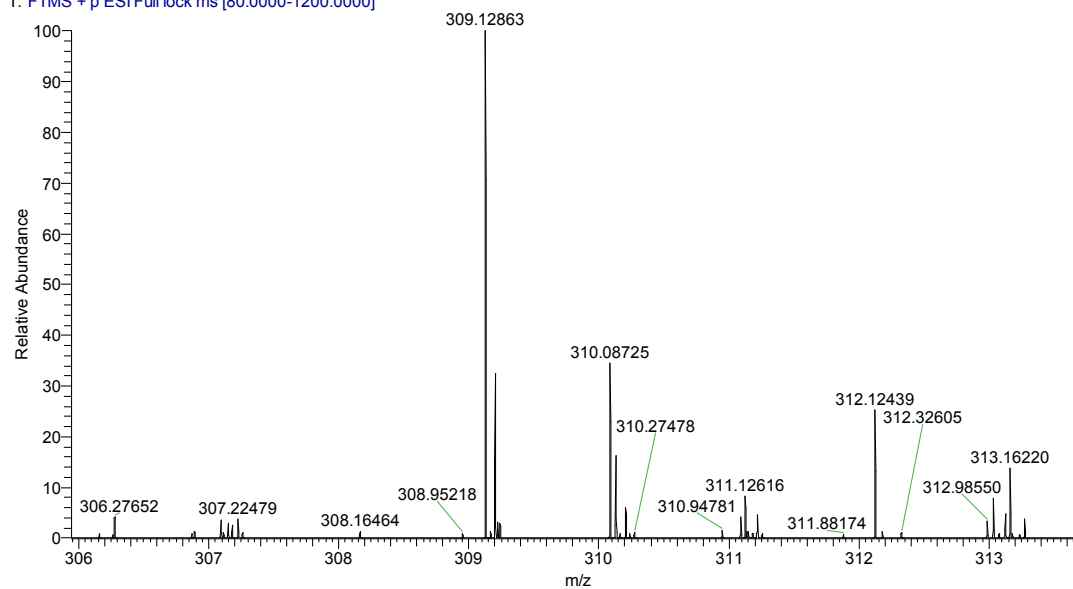

1-26 #11 RT: 0.08 AV: 1 NL: 2.58E7  
T: FTMS + p ESI Full lock ms [80.0000-1200.0000]

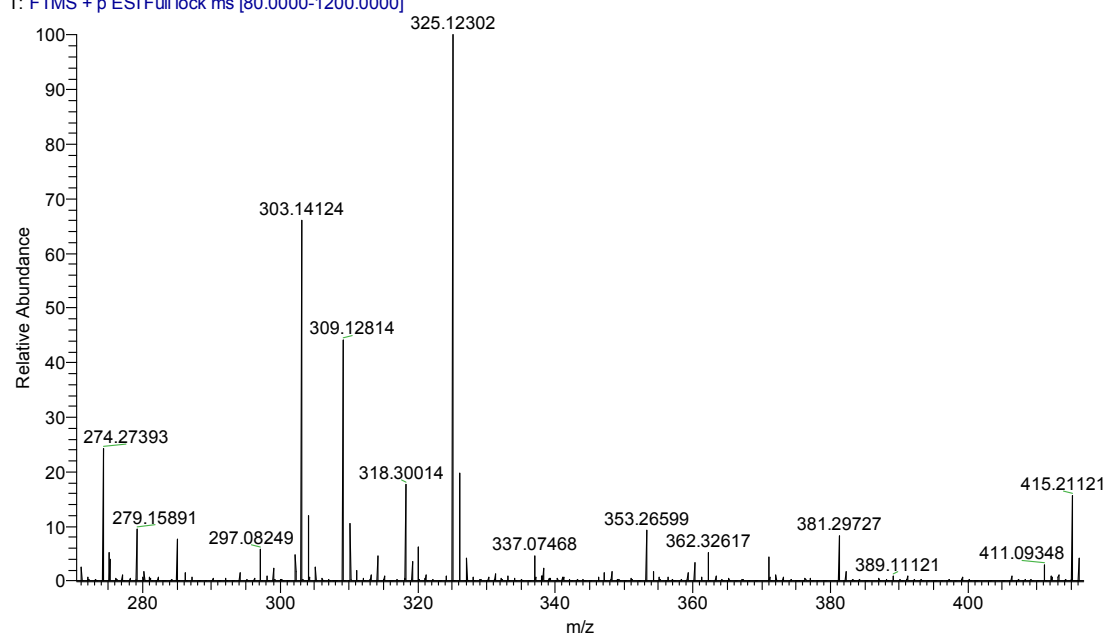

---

---
